1 **TGF $\beta$  receptor inhibition unleashes interferon- $\beta$  production by tumor-associated**  
2 **macrophages and enhances radiotherapy efficacy**

3 Pauline Hamon<sup>1\*</sup>, Marine Gerbé de Thoré<sup>1\*</sup>, Marion Classe<sup>1,2</sup>, Nicolas Signolle<sup>3</sup>, Winchygn Liu<sup>1</sup>,  
4 Olivia Bawa<sup>3</sup>, Lydia Meziani<sup>1</sup>, Céline Clémenson<sup>1</sup>, Fabien Milliat<sup>4</sup>, Eric Deutsch<sup>1,5,§</sup>, Michele  
5 Mondini<sup>1,§</sup>

6 <sup>1</sup> Gustave Roussy, Université Paris-Saclay, INSERM U1030, F-94805, Villejuif, France

7 <sup>2</sup> Gustave Roussy, Département de Pathologie, F-94805, Villejuif, France

8 <sup>3</sup> Gustave Roussy, Plateforme de pathologie expérimentale et translationnelle, UMS AMMICA,  
9 F-94805, Villejuif, France

10 <sup>4</sup> Department of Radiobiology and Regenerative MEDicine (SERAMED), Laboratory of MEDical  
11 Radiobiology (LRMed), Institute for Radiological Protection and Nuclear Safety (IRSN), F-92260  
12 Fontenay-aux-Roses, France

13 <sup>5</sup> Gustave Roussy, Département d'Oncologie-Radiothérapie, F-94805, Villejuif, France

14 \* Contributed equally

15 § Share senior authorship

16

17 **Running title:** TGF $\beta$ R inhibition increases IFN $\beta$  in macrophages after RT

18 **Correspondence to:** Michele Mondini ([michele.mondini@gustaveroussy.fr](mailto:michele.mondini@gustaveroussy.fr)) and Eric Deutsch  
19 ([eric.deutsch@gustaveroussy.fr](mailto:eric.deutsch@gustaveroussy.fr)), Gustave Roussy, INSERM U1030, 114 rue Edouard Vaillant,  
20 F-94805 Villejuif, France

21 **Keywords:** radiotherapy, interferon, TGF $\beta$ , tumor-infiltrating lymphocytes, macrophages

22

## 1 **Declarations**

2 Ethics approval: Animal procedures were performed according to protocols approved by the  
3 Ethical Committee CEEA 26 and the Ministère de l'Enseignement Supérieur et de la Recherche  
4 (MESR) and in accordance with recommendations for the proper use and care of laboratory  
5 animals.

6 Competing interests: P.H., E.D. and M.M. declare funding from Eli Lilly for this work. L.M., C.C.,  
7 E.D., and M.M. declare grants from Roche Genentech, Servier, AstraZeneca, Merck Serono,  
8 Bristol-Myers Squibb, Boehringer Ingelheim, AC Biosciences and MSD outside the submitted  
9 work. E.D. declares personal fees from Roche Genentech, AstraZeneca, MSD, AMGEN, Accuray  
10 and Boehringer Ingelheim outside the submitted work. E.D. declares shared patents with NH-  
11 Theraguix and Clevexel.

12 Funding: The authors received financial support from Eli Lilly, INSERM, SIRIC SOCRATE,  
13 Fondation ARC pour la recherche sur le cancer (Projet Fondation ARC and ARC SIGN'IT),  
14 Agence Nationale de la Recherche (ANR), Institut National du Cancer (INCa 2018-1-PL BIO-06-  
15 1) and Fondation pour la Recherche Médicale (FRM DIC20161236437).

16 Author contributions: P.H. performed experiments, analyzed results and wrote the  
17 manuscript. M. G-d-T. performed experiments, analyzed results and revised the manuscript.  
18 M.C. analyzed results and revised the manuscript. N.S. analyzed results. W.L. performed  
19 experiments. L.M., C.C. and F.M. provided technical support and revised the manuscript. E.D.  
20 designed and supervised the study and revised the manuscript. M.M. designed and supervised  
21 the study, performed experiments, analyzed the results and wrote the manuscript.

22 Acknowledgments: The authors thank Hélène Rocheteau (PETRA platform), Yann Lecluse,  
23 Philippe Rameau and Cyril Catelain (PFIC platform), Patrick Gonin and Karine Ser-Le-roux (PFEP

1 platform) at Gustave Roussy for technical assistance, C. Brunner (Universitätsklinik Ulm, Ulm,  
2 Germany) for providing the SCC VII cells and Nadège Bercovici for the fruitful discussions.

3 Author information: P.H.'s current address is Department of Oncological Sciences, The  
4 Immunology Institute, Tisch Cancer Institute, Icahn School of Medicine at Mount Sinai, New  
5 York, NY, 10029, USA.

## 6 **List of Abbreviations**

7 TGF $\beta$ : transforming growth factor-beta; RT: radiotherapy; TGF $\beta$ R2: TGF $\beta$  receptor; HNSCC:  
8 head and neck squamous cell carcinoma; IFN: interferon; TAMs: tumor-associated  
9 macrophages; Tregs: regulatory T cells; EMT: epithelial-to-mesenchymal transition; TME:  
10 tumor microenvironment; CTL: cytotoxic CD8 T cell; LAP: latency-associated peptide; ROS:  
11 reactive oxygen species; IFNAR: interferon- $\alpha/\beta$  receptor; BMDMs: bone marrow derived  
12 macrophages; CCRT: chemoradiotherapy; Tconv: conventional T cells; NK: natural killer cells;  
13 DCs: dendritic cell; MFI: mean fluorescence intensity

14

## 15 **ABSTRACT**

16 **Background:** Transforming growth factor-beta (TGF $\beta$ ) can limit the efficacy of cancer  
17 treatments, including radiotherapy (RT), by inducing an immunosuppressive tumor  
18 environment. The association of TGF $\beta$  with impaired T cell infiltration and antitumor immunity  
19 is known, but the mechanisms by which TGF $\beta$  participates in immune cell exclusion and limits  
20 the efficacy of antitumor therapies warrant further investigations.

1 **Methods:** We used the clinically relevant TGF $\beta$  receptor 2 (TGF $\beta$ R2)-neutralizing antibody  
2 MT1 and the small molecule TGF $\beta$ R1 inhibitor LY3200882 and evaluated their efficacy in  
3 combination with RT against murine orthotopic models of head and neck and lung cancer.

4 **Results:** We demonstrated that TGF $\beta$  pathway inhibition strongly increased the efficacy of RT.  
5 TGF $\beta$ R2 antibody upregulated interferon beta (IFN $\beta$ ) expression in tumor-associated  
6 macrophages (TAMs) within the irradiated tumors and favored T cell infiltration at the  
7 periphery and within the core of the tumor lesions. We highlighted that both the antitumor  
8 efficacy and inhibition of immune exclusion observed with the combination of MT1 and RT  
9 were dependent on type I interferon signaling.

10 **Conclusions:** These data shed new light on the role of TGF $\beta$  in limiting the efficacy of RT,  
11 identifying a novel mechanism involving the inhibition of macrophage-derived type I  
12 interferon production, and fostering the use of TGF $\beta$ R inhibition in combination with RT in  
13 therapeutic strategies for the management of head and neck and lung cancer.

14

## 15 **BACKGROUND**

16 Radiotherapy (RT) contributes to the treatment of more than 60% of all cancer patients,  
17 including a significant proportion of head and neck squamous cell carcinoma (HNSCC) and  
18 lung cancer patients. It is widely accepted that RT efficacy relies not only on its cytotoxic  
19 activity but also on its widespread effects on the tumor microenvironment and notably on the  
20 modulation of the immune response. In the last decade, a large amount of preclinical data  
21 have been generated, demonstrating that RT can trigger both adaptive and innate immune  
22 responses toward antitumor activity. Indeed, RT can induce so-called “immunogenic cell

1 death" (ICD), a cell death modality that fosters a T-cell mediated immune response against  
2 tumor antigens [1]. RT can also activate the STING cytosolic DNA-sensing pathway, triggering  
3 the interferon (IFN) response and thus stimulating an antitumor adaptive immune response,  
4 which plays a pivotal role in mediating the antitumor effects of RT [2]. On the other hand, it  
5 has also been shown that RT can trigger immunosuppressive signals. For instance, we and  
6 others have shown that upon irradiation, an influx of monocytes and regulatory T cells (Tregs)  
7 into the tumor, which are recruited via the CCL2/CCR2 pathway, restrain the antitumor  
8 efficacy of RT [3,4]. Several other cellular and soluble factors contributing to the development  
9 of an immunosuppressive environment can limit the efficacy of cancer treatments. Among  
10 these, transforming growth factor-beta (TGF $\beta$ ), a pleiotropic cytokine involved in numerous  
11 pathways of tumor growth, appears to play a prominent role. TGF $\beta$  can promote tumor  
12 metastasis and progression by increasing the motility of cancer cells, facilitating the process  
13 of epithelial-to-mesenchymal transition (EMT), inducing angiogenesis and recruiting myeloid  
14 cells within the tumor microenvironment (TME) [5]. TGF $\beta$  also exerts immunosuppressive  
15 effects through the induction of Tregs and the inhibition of cytotoxic CD8 T cell (CTL) activities  
16 [6]. There is also evidence that TGF $\beta$  signaling limits T cell infiltration in the TME and the  
17 response to immune checkpoint blockade [7,8]. A recent report demonstrated that CD8 T cell  
18 trafficking to the tumor is limited by TGF $\beta$  through inhibition of CXCR3 expression in CD8<sup>+</sup> T  
19 cells [9]. As TGF $\beta$  is implicated in several different pathways, the mechanisms by which TGF $\beta$   
20 participates in immune cell exclusion and limits the efficacy of antitumor therapies warrant  
21 further investigations.

22 TGF $\beta$  is secreted as a latent complex in the extracellular matrix until external stimuli dissociate  
23 it from latency-associated peptide (LAP) [10]. RT-generated reactive oxygen species (ROS)

1 modify the LAP-TGF $\beta$  complex to release active cytokines [11]. The increased bioavailability of  
2 TGF $\beta$  within the TME of irradiated tumors can contribute to the generation of an  
3 immunosuppressive environment that hampers the efficacy of RT. Accordingly, antibody-  
4 mediated TGF $\beta$  neutralization synergizes with RT and generates CD8 T cell responses to  
5 multiple endogenous tumor antigens in poorly immunogenic mouse carcinomas [12].

6 Ligand interactions with transforming growth factor  $\beta$  receptor type I (TGF $\beta$ R1) and type II  
7 (TGF $\beta$ R2) complexes are responsible for the biological activity of TGF $\beta$ . Binding of TGF $\beta$  ligands  
8 (TGF $\beta$  1, 2, or 3) to TGF $\beta$ R2 induces phosphorylation of the receptor's serine/threonine kinase  
9 domain, and then the ligand-receptor forms a heterotrimeric phosphoprotein complex with  
10 TGF $\beta$ R1, triggering the activation of TGF $\beta$  signaling pathways [13]. Inhibition of TGF $\beta$ R1 or R2  
11 impairs the SMAD-dependent signal transduction elicited by active TGF $\beta$  [14]. Targeting  
12 TGF $\beta$ R2 with a specific neutralizing antibody has shown significant efficacy against primary  
13 tumor growth and metastasis [15,16].

14 Here, we identified a novel mechanism for TGF $\beta$ -mediated immune suppression after RT. Such  
15 mechanism involves the inhibition of type I interferon production by myeloid cells. Using the  
16 clinically relevant TGF $\beta$ R2 neutralizing antibody MT1 (the murine equivalent of the human  
17 LY3022859 antibody [17]) and the small molecule TGF $\beta$ R1 inhibitor (LY3200882 [18]), we  
18 demonstrated that TGF $\beta$  pathway inhibition strongly increased the efficacy of RT against two  
19 different murine orthotopic models of head and neck carcinoma, as well as an orthotopic  
20 model of lung cancer. TGF $\beta$ R2 antibody unleashed IFN $\beta$  synthesis by macrophages and  
21 significantly favored T cell infiltration not only at the tumor periphery but also throughout all  
22 tumor regions, including the core. Finally, we demonstrated that both the antitumor efficacy  
23 and the inhibition of immune exclusion observed with the combination of anti-TGF $\beta$ R2 and RT

1 were dependent on type I interferon signaling. These data shed new light on the crosstalk  
2 between the TGF $\beta$  and type I IFN pathways and foster the use of TGF $\beta$ R inhibition in  
3 combination with RT in therapeutic strategies for the management of head and neck and lung  
4 cancer.

5

## 6 **METHODS**

### 7 **Cell lines**

8 The TC-1 tumor cell line was derived from primary lung epithelial cells of a C57Bl6 mouse  
9 cotransformed with HPV-16 oncoproteins E6 and E7 and the c-Ha-ras oncogene [19]. Firefly  
10 luciferase-expressing TC1 (TC1/Luc) cells were kindly provided by T.C. Wu (Johns Hopkins  
11 Medical Institutions, Baltimore, MD, USA) in 2009. The RAW 264.7 monocyte/macrophage cell  
12 line was obtained from ATCC (Manassas, VA, USA). The head and neck murine SCC VII cells  
13 were kindly provided by C. Brunner (Universitätsklinik Ulm, Ulm, Germany). Lewis lung  
14 carcinoma cells expressing luciferase (LL2/Luc) were purchased from Caliper Life Sciences  
15 (Hopkinton, MA, USA). Cell lines were routinely screened for mycoplasma contaminations  
16 using the MycoAlert mycoplasma detection kit (Lonza).

### 17 **Animal models**

18 Seven- to eight-week-old C57BL/6 and C3H/HeN female mice were purchased from Janvier  
19 CERT (Le Genest St. Isle, France), and athymic nude-*nu/nu* mice were bred at the Gustave  
20 Roussy animal facility (Plateforme d'Evaluation Preclinique, PFEP). All animals were housed at  
21 PFEP and included in experiments after at least one week of acclimatization period. To

1 establish a head and neck tumor models, syngeneic tumor grafts were initiated by injection of  
2 50  $\mu$ L of PBS suspension containing  $5 \times 10^5$  TC1/Luc or SCC VII cells at submucosal sites on the  
3 right inner lips of C57Bl/6 mice or C3H/HeN mice respectively, as previously described [20]. For  
4 orthotopic lung tumors, the skin was incised, 100,000 LL2/Luc cells (in PBS + Matrigel (BD  
5 Biosciences), 10  $\mu$ l) were injected directly into the lung through the pleura and then the  
6 wound was closed by suture clips [21]. Throughout the study, researchers were aware of the  
7 group allocation at any stage of the experiment or data analysis. The health, weight and  
8 behavior of the mice were assessed three times per week. Mice were euthanized upon the  
9 presentation of defined criteria (tumor size and bioluminescent signal, loss of >20% of the  
10 initial weight), and a survival time was recorded to perform a survival analysis for the  
11 treatment groups.

## 12 **Irradiation**

13 For head and neck tumors, RT-treated mice received single-beam local irradiation of the head  
14 and neck region 7 days (TC1/Luc model) or 9 days (SCC VII model) after tumor inoculation  
15 using a 200 kV Varian X-ray irradiator. Mice bearing lung tumors received a whole thorax  
16 irradiation. Selective irradiation was performed by the interposition of a 4-cm-thick lead shield  
17 on a schedule delivering 8 Gy (for TC1/Luc) or 12 Gy (for SCC VII and LL2/Luc) in a single fraction  
18 at a dose rate of 1.08 Gy/min.

## 19 **Antibodies and treatments**

20 The anti-TGF $\beta$ 2 antibody MT1, and the rat IgG2a isotype control were supplied by Eli Lilly,  
21 New York, NY, USA. Antibodies were administered intraperitoneally (i.p.) at 40 mg/kg for MT1  
22 once a week starting at the indicated time point. Anti-interferon- $\alpha/\beta$  receptor (IFNAR)



1 antibody (clone MAR1-5A3) and mouse IgG1 isotype control (clone MOPC-21) were purchased  
2 from BioXcell and administered i.p. at 200 µg/mouse before RT and then three times per week  
3 for a total of four injections. Mice received i.p. injections of 100 µg per mouse of anti-CD8 mAb  
4 (clone 2.43; BioXCell) one day before RT to deplete CD8 T cells. The TGFβR1 inhibitor  
5 LY3200882 was supplied by Eli Lilly. This inhibitor was reconstituted in hydroxyethyl-cellulose  
6 (HEC) 0.25% Tween 80 and administered by oral gavage at 75 mg/kg twice a day starting at D7  
7 for 2 weeks. HEC 0.25% Tween 80 as a vehicle was administered at the same frequency to the  
8 control groups.

9 To deplete tumor macrophages, mice bearing TC1/Luc head and neck tumors received  
10 intratumor injection of 20 µl of clodronate liposomes (clodrosomes, Liposoma BV) or PBS-  
11 loaded liposomes (Liposoma BV), used as control, twenty minutes before irradiation, as  
12 previously described [22].

### 13 **Histological analysis**

14 Tumors were fixed in 4% buffered paraformaldehyde (PFA), paraffin embedded, and then cut  
15 into 4 µm sections. Immunostaining was performed using a Ventana Benchmark® automaton  
16 (Ventana, AZ, USA) using anti-CD8 (Cell Signaling, 98941) anti-CD31 (Abcam, ab28364) and  
17 anti-CAIX (Abcam, ab15086) antibodies, and digitized using a slide scanner (Olympus VS120,  
18 Olympus, Japan). Quantification of stained cells was performed by image analysis using  
19 Qupath software. A semiquantitative analysis of CD8<sup>+</sup> infiltration was performed by a head  
20 and neck pathologist at the tumor invasive margin and within the tumor core. CD8<sup>+</sup> infiltrate  
21 was scored from 0 to 3 (score 0: none or negligible even at 20x magnification; score 1: scarce  
22 infiltrate observed only at a moderate magnification (10x); score 2: moderate observed at a  
23 low magnification (5x); score 3: abundant infiltrate easily observed at low magnification (5x)).

1 Tumor regression (percent of viable tumor cells) was evaluated by a head and neck pathologist  
2 according to the usual criteria used in daily practice conditions [23].

### 3 ***In vivo* imaging**

4 To monitor tumor growth, bioluminescence imaging was performed on the indicated days  
5 using the Xenogen *In Vivo* Imaging System 50 (IVIS; Perkin Elmer) as previously described and  
6 analyzed using Living Image analysis software (Perkin Elmer) [20]. Briefly, mice were injected  
7 with D-luciferin i.p. (150 mg/kg) and anesthetized with isoflurane 10 min before imaging.

### 8 **Flow cytometry cell analysis**

9 Phenotypic characterization of murine cells was performed using an LSR Fortessa instrument  
10 (Becton Dickinson) with DIVA<sup>®</sup> Flow Cytometry software. For data analysis, FlowJo software  
11 (Tree Star Inc.) was used. Five days post radiotherapy, blood was drawn in the cheek with a  
12 lithium-heparin minivette POCT (Sarstedt, Germany) and directly stained with antibodies.  
13 After staining, erythrocytes were lysed in lysis buffer (BD Pharm Lyse<sup>™</sup>, BD Biosciences) and  
14 resuspended in FACS buffer (Stain Buffer FBS, BD Biosciences). At the same time, TC1/Luc oral  
15 tumors were digested in RPMI medium (Gibco, Invitrogen, France) supplemented with  
16 collagenase IV (1 mg/mL, Sigma) and DNase 1 (1 mg/ml) for 30 min at 37 °C, resuspended in  
17 PBS and filtered using a 40 µm-pore cell strainer (BD Biosciences). After centrifugation at 1500  
18 rpm for 5 min at 4 °C, the cells were filtered again using a 70 µm-pore cell strainer (BD  
19 Biosciences) in PBS. Surface staining was performed by incubating 1/10<sup>th</sup> of the cell suspension  
20 with 1 µg/mL purified anti-CD16/32 (clone 2.4G2, BD Biosciences) for 10 min at 4 °C followed  
21 by an additional 20 min incubation with appropriate dilution of the surface marker antibodies.  
22 Cells were then washed once in FACS buffer and directly analyzed by flow cytometry. The

1 panels of antibodies used were: anti-CD11b (clone M1/70), anti-Ly6C (clone AL-21), anti-  
2 Siglec-F (clone E50-2440), anti-CD8 (clone 53-6.7), anti-CD25 (clone PC61), anti-IFN $\gamma$ , anti-PD-  
3 L1 (clone MIH5), anti-Foxp3 (clone MF23), all from BD Biosciences; anti-Ly6G (clone 1A8), anti-  
4 NK1.1 (clone PK136), anti-I-A/I-E (clone 2G9), anti-CD11c (clone N418), anti-CD45 (clone 30-  
5 F11), anti-CD4 (clone RM4-5), anti-CD64 (clone X54-5/7.1) all from BioLegend. For cytokine  
6 staining, cells were pre-incubated for 2 h with the Cell Activation Cocktail containing Brefeldin  
7 A according to the manufacturer's instructions (BioLegend). After surface staining, the cells  
8 were fixed in 4% PFA for 15 min, washed in Perm/Wash solution (BD Biosciences) and  
9 incubated for 30 min at room temperature (RT) in the presence of anti-IFN $\gamma$ . For intracellular  
10 staining without preactivation, the Foxp3/Transcription Factor Staining Buffer Set (BD  
11 Biosciences), anti-Foxp3 and anti-CTLA-4 were used according to the manufacturer's  
12 instructions. Samples were washed in FACS buffer and resuspended in 200  $\mu$ L FACS buffer  
13 before acquisition.

14 Calculation of absolute cell number was performed by adding to each vial a fixed number  
15 (10,000) of nonfluorescent 10  $\mu$ m polybead<sup>®</sup> carboxylate microspheres (Polysciences, IL, USA)  
16 according to the formula: Nb of cells = (Nb of acquired cells x 10,000)/(Nb of acquired beads).  
17 The number of cells obtained for each sample was normalized per mg of tissue.

## 18 **Flow cytometry cell sorting**

19 Tumor-associated macrophages were sorted using the ARIA Fusion-UV cell sorter (BD  
20 Biosciences). TC1/Luc oral tumors were irradiated and treated with MT1 or IgG 8 days after  
21 cell inoculation. Tumors were collected 1 day after irradiation. Tumors were digested in RPMI  
22 medium (Gibco, Invitrogen, France) supplemented with collagenase IV (1 mg/mL, Sigma) and  
23 DNase 1 (1 mg/ml) for 30 min at 37 °C, entirely resuspended in PBS and filtered using a 40  $\mu$ m-

1 pore cell strainer (BD Biosciences). After centrifugation at 1500 rpm for 5 min at 4 °C, the cells  
2 were filtered again using a 70 µm-pore cell strainer (BD Biosciences) in PBS. Surface staining  
3 was performed by incubating the cell suspension with 1 µg/mL purified anti-CD16/32 (2.4G2,  
4 BD Biosciences) for 10 min at 4 °C followed by an additional 20 min incubation with  
5 appropriate dilution of the surface marker antibodies. Cells were then washed once in PBS  
6 and directly sorted by ARIA Fusion-UV. TAMs were stained with anti-CD11b (clone M1/70),  
7 anti-Ly6C (clone AL-21), anti-CD64 (clone X54-5/7.1) and anti-Ly6G (clone 1A8) and sorted as  
8 CD11b<sup>+</sup> CD64<sup>+</sup> Ly6C<sup>low</sup> Ly6G<sup>low</sup> with a purity >95%.

### 9 **Bone marrow–derived macrophages cultures**

10 The femur and tibia of C57Bl/6 mice were flushed, and bone marrow cells was obtained using  
11 a previously described protocol [24]. The adherent cells were incubated in medium  
12 supplemented with recombinant mouse M-CSF (R&D) at a concentration of 250 ng/mL for five  
13 days to induce anti-inflammatory bone marrow–derived macrophages (BMDMs) as previously  
14 described [25].

### 15 **Cytokine/chemokine array**

16 The cytokine and chemokine concentrations in tumor tissues were profiled using the Mouse  
17 Focused 10-Plex (MDF10) at Eve Technologies Corporation (AB, Canada). Protein extracts from  
18 tumor tissues were prepared by homogenization in RIPA buffer (Sigma-Aldrich, USA)  
19 containing a protease inhibitor cocktail (Roche, Switzerland) using Biomasher disposable  
20 homogenizers (Nippi, Japan). Protein extracts were diluted to 4 µg/µL, and the multiplex  
21 immunoassay was analyzed with the BioPlex 200 instrument (Bio-Rad, USA). Cytokine and

1 chemokine concentrations were calculated based on the standard curve generated using the  
2 standards included in the kit.

### 3 **Elisa**

4 RAW 264.7 cells or BMDMs were cultured as described above and then treated with  
5 recombinant mouse TGF $\beta$ 1 (Biolegend). Fifteen minutes later, the cells were irradiated with 8  
6 Gy and then treated with MT1 or IgG at 0.1  $\mu$ g/mL. Treatments with TGF $\beta$  and MT1 or IgG  
7 were renewed 24 h after irradiation. Supernatants were collected one day later. Supernatants  
8 of BMDMs were 5-fold concentrated using the Amicon Ultra-0,5 Membrane Ultracel-10  
9 columns (Merck Millipore) and the IFN $\beta$  concentration was evaluated using the VeriKine  
10 Mouse Interferon Beta HS ELISA Kit (PBL assay science).

### 11 **Quantitative PCR**

12 Total RNA was extracted from sorted macrophages using the Qiagen Micro Plus RNeasy kit.  
13 RNA was retrotranscribed using SuperScript VILO Mix (Invitrogen). qRT-PCR analysis of IFN $\beta$   
14 was performed using Fast Advanced TaqMan Master Mix (Invitrogen) with the predesigned  
15 TaqMan assays Mm00439552\_s1 (mIFN $\beta$ ) and Mm00437762\_m1 (beta2 microglobulin, B2M)  
16 as housekeeping genes (Invitrogen) using the 7500 RealTime PCR System (Life Technologies).

### 17 **Statistical analyses**

18 Statistical analyses were performed using Prism Version 9 (GraphPad, CA, USA). Survival data  
19 were analyzed using the Kaplan-Meier and log-rank tests for survival distribution. The  
20 bioluminescent signal (serving as a measurement of tumor size), immune infiltrate and  
21 cytokine levels were analyzed using appropriate tests as indicated. Multigroup analyses of

1 variances were performed using one-way ANOVA followed by indicated post-tests or the  
2 Kruskal-Wallis test followed by Dunn's multiple comparisons test. For simple comparison  
3 analysis, the unpaired Student's t-test with Welch's correction was used to compare  
4 parametric distributions, while non-parametric testing was performed using the Mann-  
5 Whitney test. \*:  $p < 0.05$ ; \*\*:  $p < 0.01$ ; \*\*\*:  $p < 0.001$ ; \*\*\*\*:  $p < 0.0001$ ; ns: nonsignificant.

6

## 7 **RESULTS**

### 8 **TGF $\beta$ receptor blockade increases radiotherapy efficacy in head and neck and lung tumors**

9 We previously demonstrated that 7.5 Gy irradiation exerted a limited effect on murine oral  
10 tumors when obtained by orthotopic injection of the TC1/Luc cell line at a submucosal site of  
11 the inner lip in syngeneic mice [4,20]. Using the same model, we showed that two weekly  
12 administrations of the anti-TGF $\beta$ 2 antibody (MT1) were sufficient to significantly improve  
13 the antitumor efficacy of RT (Fig. 1A-B). Bioluminescent *in vivo* imaging showed that MT1 and  
14 RT as monotherapies slightly reduced tumor growth, while the combined treatment resulted  
15 in shrinkage of most of the tumors with long-lasting complete responses (Fig. 1B). Accordingly,  
16 mouse survival was significantly increased in the group receiving the RT and MT1 combination,  
17 with a median survival of 36 days, compared to 11.5 days and 17 days for the IgG-treated and  
18 RT groups, respectively (Fig. 1A). We further confirmed that TGF $\beta$ 2 blockade improves the  
19 efficacy of RT in another orthotopic model of head and neck cancer obtained by the  
20 intramucosal injection of the HPV-negative SCC VII cells. The combination of MT1 treatment  
21 with a 12Gy local irradiation significantly increased the mouse survival when compared to RT  
22 alone (Fig. 1C). The antitumor activity of MT1 in combination with RT was not restricted to the

1 oral tumor setting, as the survival of mice bearing LL2/Luc lung orthotopic tumors was  
2 improved when they were treated with the RT and MT1 combination (Fig. 1D). Finally, the  
3 inhibition of TGF $\beta$ R1 using the small molecule LY3200882 confirmed that targeting the TGF $\beta$   
4 pathway increases the efficacy of RT, even if the effects were lower than those observed with  
5 MT1 in the TC1/Luc model (Supp. Fig. 1A-C).

6 Altogether, these data showed that the combination of radiotherapy with TGFBR inhibition is  
7 beneficial in multiple cancer type as head and neck and lung tumors.

#### 8 **TGF $\beta$ R2 inhibition by MT1 fosters an antitumor immune environment in irradiated tumors**

9 Local radiotherapy has been described to induce immunogenic cell death and the recruitment  
10 of immune cells to the tumor site [1]. As TGF $\beta$  is immunosuppressive, we hypothesized that  
11 the combination of MT1 would synergize with RT and modify T cell infiltration and function.  
12 We analyzed the immune environment of TC1/Luc oral tumors 6 days after treatment  
13 administration. Irradiation slightly upregulated the number of tumor-infiltrating CD8<sup>+</sup> T cells  
14 compared to control mice, while it was strongly enhanced by the combination with MT1  
15 antibody, reaching nearly 8-fold the level observed in untreated tumors (Fig. 2A). Similar  
16 recruitment was observed for CD4<sup>+</sup> conventional T cells (Tconv), Tregs and NK cells in the  
17 RT+MT1 group (Fig. 2A). In the irradiated groups, tumor-infiltrating CD8<sup>+</sup> T cells were  
18 activated, as demonstrated by an increase in the proportion of IFN $\gamma$ -producing cells (Fig. 2B).  
19 Accordingly, cytokine profiling of tumor protein extracts showed an increased amount of IFN $\gamma$   
20 in the tumor environment in mice treated with the RT and MT1 combination and a trend for  
21 other proinflammatory cytokines, such as IL-1 $\beta$  and IL-6, as well as TNF $\alpha$ , while IL-4 and IL-12  
22 were unaffected by the treatment (Fig. 2C).

23

## 1 **MT1 favors in-depth cytotoxic T-cell infiltration of irradiated tumors**

2 A strong limitation of T cell-mediated antitumor function is the quality of recruitment and  
3 infiltration of cytotoxic CD8 T cells within the tumor. “Cold” HNSCCs with poor lymphoid  
4 infiltration have the worst overall survival, including when treated with RT [26]. Histological  
5 examinations of TC1/Luc tumor tissues 6 days post treatment confirmed that the combination  
6 of RT and MT1 exerted a significant antitumor effect, with a 70% reduction of the remaining  
7 viable tumor tissue compared to IgG control (Fig. 3A), which is in agreement with data  
8 observed by *in vivo* bioluminescent imaging (Fig. 1B). MT1 treatment induced a trend in  
9 increasing the vascularization of the tumors, as shown by immunohistochemistry (IHC) CD31  
10 staining (Supp. Fig. 2A-B), as well as a reduction of tumor hypoxia, as shown by the reduction  
11 of the extent of staining of the hypoxic marker CAIX (Supp. Fig. 2C-D). IHC staining for CD8  
12 showed an accumulation of CD8<sup>+</sup> T cells in the combination group (see representative images  
13 in Fig. 3B and quantification in Fig. 3C), confirming the data obtained by flow cytometry (Fig.  
14 2A). Interestingly, while the density of CD8<sup>+</sup> T cells increased at the periphery of the tumor in  
15 all treatment groups when compared to control mice (Fig. 3D), the combination of RT and MT1  
16 induced a higher accumulation in the tumor core than the single treatments (Fig. 3E).  
17 Automated quantification of the spatial distribution of CD8<sup>+</sup> T cells showed that their density  
18 steadily decreased from the periphery to the core in the control and monotherapy groups but  
19 remained stable throughout all RT+MT1-treated tumors (Fig. 3F, left graph). Therefore, the  
20 ratio of CD8<sup>+</sup> T cell density in the RT+MT1 vs IgG group strongly increased when going toward  
21 the inner tumor core (Fig. 3F, right graph). This demonstrates that the combination treatment  
22 with MT1 favors the accumulation of CD8<sup>+</sup> T cells even within poorly infiltrated tumor regions.

23



## 1 **MT1 and RT combination efficacy depends on CD8<sup>+</sup> T cells**

2 To validate that the efficacy of the combination of MT1 and RT relied on increased activation  
3 of the antitumor immune response, we injected TC1/Luc cells into the oral mucosa of nude  
4 mice. Analysis of tumor growth and survival (Supp. Fig. 3A-B) showed that MT1 treatment had  
5 no effects in immunodeficient mice, without any improvement in the efficacy of radiotherapy.  
6 We next demonstrated that the activity of tumor-infiltrating CD8<sup>+</sup> T cells was required to  
7 mediate the effects of TGF $\beta$ 2 inhibition. Indeed, when we depleted this population using an  
8 anti-CD8 antibodies, the efficacy of the combined treatment was completely lost, and none of  
9 the mice responded to the combination of RT with MT1 (Fig. 4A). Accordingly, the survival of  
10 the mice was significantly reduced when CD8 antibodies were administered to mice treated  
11 with RT and MT1 combination, reaching a level similar to that observed in mice treated with  
12 RT alone (Fig. 4B). We next evaluated if the activation of the immune system by the  
13 combination of RT and MT1 could result in the induction of long-term antitumor immune  
14 memory. To test this hypothesis, 10 mice treated with RT and MT1 that underwent complete  
15 tumor clearance and that were still tumor free 60 days after tumor engrafting, were  
16 challenged again with TC1/Luc cells. None of the mice developed a tumor, while all treatment-  
17 naïve mice (used as positive controls) displayed a tumor growth as expected (Fig. 4C).

## 18 **TGF $\beta$ 2 inhibition triggers the production of IFN $\beta$ by irradiated macrophages**

19 Together with increased T cell infiltration, RT slightly increased the number of tumor-  
20 associated macrophages (TAMs) 6 days after radiotherapy in TC1/Luc tumors (Fig. 5A), in  
21 agreement with our previous report [4], which was not further modulated by treatment with  
22 MT1. A trend of an increase in Ly6C<sup>high</sup> monocytes was also observed in tumors treated with  
23 RT and MT1 combination (Fig. 5A). Interestingly, TAMs and, to a lesser extent, Ly6C<sup>high</sup>

1 monocytes increased their cell membrane levels of PD-L1, likely reflecting their increased  
2 activation states (Fig. 5B).

3 As RT is known to trigger the STING-Type I IFN pathway, we verified whether TGF $\beta$  could  
4 modulate IFN $\beta$  secretion by myeloid cells. As shown in Fig. 5C, treatment of the macrophage  
5 cell line RAW264.7 with TGF $\beta$  at 0.5 ng/ml or higher significantly decreased the concentration  
6 of IFN $\beta$  in the supernatant of *in vitro* irradiated cells. Incubation with MT1 was sufficient to  
7 partially restore IFN $\beta$  production by irradiated RAW264.7 cells, with the IFN $\beta$  concentration  
8 significantly increased in cells treated with TGF $\beta$  and MT1 compared to TGF $\beta$  alone (Fig. 5D).

9 We next differentiated bone marrow-derived macrophages (BMDMs) towards an  
10 immunosuppressive phenotype using high concentration of M-CSF [25]. Supernatant of  
11 irradiated BMDMs contained low amounts of IFN $\beta$  that were not reduced further by TGF $\beta$   
12 treatment (Fig. 5E). Of note, MT1 treatment increased the secretion of IFN $\beta$  by the irradiated  
13 BMDMs (Fig. 5E), indicating that TGF $\beta$ R2 inhibition can trigger the production of IFN $\beta$  by  
14 immunosuppressive macrophages. Importantly, qPCR analysis of mRNA extracted from TAMs  
15 sorted from TC1/Luc oral tumors one day after treatment showed that the inhibition of the  
16 TGF $\beta$  pathway mediated by MT1 treatment triggered the upregulation of IFN $\beta$  transcripts  
17 post-RT (Fig. 5F). We also confirmed the significant increase of IFN $\beta$  mRNA in macrophages  
18 sorted from SCC VII head and neck and LL2/Luc lung tumors treated by the combination of RT  
19 and MT1 (Supp. Fig. 4A-B). These data demonstrate that TGF $\beta$  in the tumor environment  
20 impairs the type I IFN response mediated by irradiated macrophages, and that treatment with  
21 MT1 can restore their IFN $\beta$  production.

22

1 **Type I interferon pathway mediates immune-stimulating antitumor effects of TGF $\beta$ R2**  
2 **inhibition**

3 To functionally assign a role to IFN $\beta$  in the response to RT and TGF $\beta$ R2 inhibition, we treated  
4 TC1/Luc tumor-bearing mice with anti-type I IFN receptor subunit 1 neutralizing antibody  
5 (anti-IFNAR). While anti-IFNAR treatment slightly affected the tumor growth and survival of  
6 mice treated with RT alone, the efficacy of treatment combined with RT and MT1 was severely  
7 impaired (Supp. Fig. 5A). The survival benefit mediated by MT1 in irradiated mice was  
8 completely abrogated when treated with anti-IFNAR (Fig. 6A), indicating that a functional type  
9 I interferon pathway is essential to convey the effects of TGF $\beta$ R2 inhibition in irradiated mice.  
10 Accordingly, the viable tumor area as quantified by a head and neck pathologist on histological  
11 sections was not reduced when anti-IFNAR was added to the combination of RT and MT1 (Fig.  
12 6B). Additionally, there was no increase in vessel area (Supp. Fig. 5B) and the reduction in  
13 tumor hypoxia was limited (Supp. Fig. 5C). The loss of efficacy of MT1 in mice treated with  
14 anti-IFNAR was accompanied by severely reduced tumor infiltration by CD8<sup>+</sup> T cells (Fig. 6C-F),  
15 including within the tumor core (Fig. 6F), indicating that the abrogation of TGF $\beta$ -mediated  
16 immune exclusion upon TGF $\beta$ R2 inhibition is mediated by the activity of type I interferon.  
17 Importantly, we also confirmed the pivotal role of type I IFN pathway in mediating the effects  
18 of RT and MT1 combination in the SCC VII head and neck (Supp. Fig. 5D) and in the LL2/Luc  
19 lung (Supp. Fig. 5E) tumor models.

20 Finally, we determined the functional role of tumor macrophages in the response to RT and  
21 MT1 by depleting them in irradiated TC1/Luc tumors *via* intratumor injection of clodronate  
22 liposomes (clodrosomes, Fig. 6G-H). TAM depletion by clodrosomes was sufficient to improve  
23 the response to RT when compared to mice treated with PBS-loaded control liposomes (Fig.

1 6G-H), in agreement with previous reports [22]. The beneficial effect of MT1 in combination  
2 with RT was lost in clodrosomes-treated mice, with no significant reduction of tumor size (Fig.  
3 6G) nor improvement of mouse survival (Fig. 6H) in RT+clodrosomes+MT1 mice when  
4 compared to RT+clodrosomes mice, in contrast with the significant improvement observed in  
5 RT+control liposomes+MT1 mice when compared to RT+control liposomes mice, as expected.  
6 These data assign a functional role to TAMs in mediating the effects of the combination of RT  
7 and MT1.

8

## 9 **DISCUSSION**

10 A main factor for effective anticancer therapy is its ability to induce an immunogenic  
11 antitumor response. Several preclinical data have shown that RT can promote an antitumor  
12 immune response, and it has been proposed to behave as an *in situ* vaccine [27]. Nevertheless,  
13 highly heterogeneous changes in the tumor immune landscape were reported in cervical  
14 cancer patients during the course of concurrent chemoradiotherapy (CCRT), demonstrating  
15 that immune activation after CCRT occurs only in a subset of patients, while others even  
16 experience a weakening of immune markers during treatment [28,29]. Accordingly, several  
17 mechanisms can limit RT efficacy: in addition to non-inflamed phenotypes (cold tumors),  
18 immune-excluded and immunosuppressed environment (strongly relying on TGF $\beta$ )  
19 contributes to therapeutic failure [30,31]. Reversion of immunosuppression in the tumor  
20 microenvironment is a key step for successful anticancer therapy. TGF $\beta$  has been suggested  
21 as a central player in the contribution to tumor resistance [5,14], limiting the efficacy of either  
22 radio/chemotherapies [32] or immunomodulators [33]. Here, we showed that the TGF $\beta$   
23 pathway represents a pivotal factor of resistance to radiotherapy in two murine models of

1 oral cancer and in an orthotopic model of lung cancer. Employing clinically available  
2 monoclonal antibodies and small molecule inhibitors of TGF $\beta$  receptors, we demonstrated  
3 that targeting the TGF $\beta$  pathway improved the efficacy of RT, in line with similar observation  
4 in breast [12,34], brain [35] and colorectal [9,34,36] cancer models, and identified a novel  
5 mechanism that implies the inhibition of IFN $\beta$  production by irradiated macrophages by TGF $\beta$ .  
6 Of interest, the effect of TGF $\beta$  inhibition in combination with RT was observed in both HPV-  
7 transformed (TC1/Luc) and HPV-negative (SCC VII and LL2/Luc) models. Our data were  
8 obtained using the RT single doses of 8Gy or 12Gy. Since the immunomodulatory effects of  
9 radiotherapy have been shown to be dependent on the dose, as well as on the fractionation  
10 scheme [37,38], it will be of interest to evaluate if other RT doses/fractions modify the  
11 response to the MT1. We also demonstrated, using blocking antibodies against the interferon-  
12  $\alpha/\beta$  receptor (IFNAR), that the improved efficacy of RT observed in TGF $\beta$ -treated mice was  
13 type I interferon dependent in the TC1/Luc and SCC VII head and neck and in the LL2/Luc lung  
14 orthotopic models.

15 Type I interferon plays a major role in the tumor response to therapies, as it contributes to  
16 the induction of a powerful adaptive immune response. After RT, DNA damage followed by  
17 dsDNA accumulation in the cytosol triggers the DNA sensing pathway via cGAS/STING, which  
18 stimulates the secretion of IFN $\beta$  [39]. Here, we showed that *in vitro* irradiation of a  
19 macrophage-like cell line is sufficient to trigger significant IFN $\beta$  production, which is in  
20 agreement with previous reports [40], and that this process is negatively regulated by the  
21 TGF $\beta$  pathway. Since it has been shown that TGF $\beta$  can limit IFN $\beta$  production by macrophages  
22 stimulated with a STING agonist through the inhibition of IRF3 phosphorylation [41], the  
23 activity of TGF $\beta$  on irradiated macrophages likely occurs in a similar way. We also showed that

1 in primary BMDMs differentiated towards an anti-inflammatory phenotype the production of  
2 IFN $\beta$  was low even after RT (when compared to what observed with the RAW264.7 cells) and  
3 was not further lowered by treatment with recombinant TGF $\beta$ , suggesting that this pathway  
4 was already activated in these immunosuppressive macrophages. Accordingly, the impaired  
5 IFN $\beta$  secretion in M-CSF-differentiated BMDMs and in TGF $\beta$ -treated RAW264.7 cells could be  
6 effectively reverted using the anti-TGF $\beta$ R2 antibody MT1, which also upregulated IFN $\beta$   
7 expression in TAMs sorted from irradiated tumors. Of note, the low but significant increase of  
8 the IFN $\beta$  transcript in TAMs from mice treated with MT1 was consistently observed in all three  
9 tumors models. Together with the observation that the effect of MT1 was abrogated by the  
10 depletion of tumor macrophage, these data strongly support the hypothesis that IFN $\beta$ -  
11 producing macrophages play a significant role in the tumor response to therapy.

12 Type I IFNs can act as a link between innate and adaptive immune responses, regulating the  
13 capacity of DCs to prime CD8 $^+$  T cells and generating tumor antigen-specific CD8 $^+$  T cells [42].  
14 In agreement with the increased activation of IFN $\beta$  following treatment with RT+MT1, we  
15 observed strong CD8 $^+$  T cell infiltration, which was type I interferon-dependent, as it was  
16 completely abrogated following anti-IFNAR administration. These tumor-infiltrating CD8 $^+$  T  
17 cells were required to mediate the effect of the combination of RT and MT1, which was lost  
18 after anti-CD8 antibody treatment. Of note, the combination therapy turns the poorly  
19 infiltrated tumors into “hot” tumors through the recruitment of CD8 $^+$  T cells throughout all  
20 tumor tissue, including the core of the tumors, while it was restricted mostly to the tumor  
21 periphery for the mice treated with RT alone. Accordingly, differential densities of CD8 $^+$  T cells  
22 in the tumor core and at the invasive margin had prognostic value for survival and response  
23 to chemotherapy in breast cancer patients [43,44]. Histological analysis of the spatial

1 infiltration patterns in different cancer types, including HNSCC, showed a heterogeneous  
2 “topography” of immune cells with a proportion of immune-excluded tumors [45], thus  
3 underlying the importance of modulating immune infiltration to optimize cancer treatment.  
4 It was shown in subcutaneous tumor settings that TGF $\beta$ RI inhibition can strongly promote  
5 tumor infiltration by CD8<sup>+</sup> T cells, through a mechanism involving the upregulation of their  
6 CXCR3 levels, which allows for improved homing to CXCR3 ligands produced in the tumor  
7 microenvironment following RT [9], and we may speculate that a similar mechanism occurs in  
8 our models. In addition, we also observed a trend for increase of the area of tumor  
9 vasculature, associated with a reduction of the hypoxia, which might suggest that MT1  
10 increases the tumor accessibility to immune cells, thus likely contributing to the induction of  
11 the complete responses observed in the combination group. It has been shown that  
12 macrophages can contribute to the T cell exclusion from tumors: in human lung tumors,  
13 macrophages mediated lymphocyte trapping by forming long-lasting interactions with CD8 T  
14 cells, and in mouse models they limited CD8 T cell migration and infiltration into tumor islets  
15 [46]. These data are in line with our observations, as it is thus conceivable to speculate that  
16 affecting the macrophage phenotype by TGF $\beta$ R inhibition could have an impact on the  
17 macrophages-CD8 T cell interaction resulting in an improved tumor infiltration.

18 Together with an increased infiltration of CD8<sup>+</sup> T cells in mice treated with the combination of  
19 RT and MT1, we also observed an increase in tumor NK cells. In agreement, TGF $\beta$  is known to  
20 limit the membrane expression of the chemokine receptors CXCR3, CXCR4 and CX3CR1, thus  
21 affecting NK cell migration and recruitment [47]. As TGF $\beta$  is also a powerful negative regulator  
22 of NK cell function [48], TGF $\beta$ R2 inhibition could restore the activity of tumor-infiltrating NK  
23 cells, which could contribute to the antitumor efficacy of the combined treatment. On the

1 other hand, we also observed a trend of an increase in the level of Tregs in tumors irradiated  
2 and treated with MT1, even if TGF $\beta$  is known to promote Treg differentiation in tumors [49].  
3 This observation is in line with a recent report from De Martino et al. [50], who observed an  
4 increase of Tregs in subcutaneous tumors treated with RT and TGF $\beta$  blockade, which was  
5 mediated by upregulation of the TGF $\beta$  family member activin A. Thus, HNSCC and lung  
6 carcinomas could likely benefit from a TGF $\beta$ /activin A double blockade to prevent Tregs  
7 accumulation.

8 Our data demonstrate that the TGF $\beta$  pathway acts as a regulator of the radiation-induced  
9 adaptive immune response, impairing the synthesis of IFN $\beta$  by TAMs and preventing the  
10 consequent type-I interferon-driven massive infiltration of the tumor by activated CD8<sup>+</sup> T cells.  
11 Given the several immunomodulatory effects observed in our models, and the induction of an  
12 immune-memory following the MT1 and RT combination treatment, it will be of interest in  
13 future studies to evaluate if TGF $\beta$ R inhibition with radiotherapy can also trigger the antitumor  
14 response in out of field (abscopal) tumors, as it was previously shown with other molecules  
15 impacting the TGF $\beta$  pathway [12,34]. These data reinforce the notion that combined  
16 immunotherapies are needed to overcome tumor immune suppression and to optimize the  
17 efficacy of the treatment.

18 Overall, our data contribute to elucidating the role of TGF $\beta$  in limiting the efficacy of  
19 radiotherapy by demonstrating that TGF $\beta$ -mediated inhibition of macrophage-derived type I  
20 interferon production can impair the adaptive immune response in irradiated tumors.

21

22



1 **FIGURE LEGENDS**

2 **Figure 1: TGF $\beta$  receptor blockade increases radiotherapy efficacy in head and neck and lung**  
3 **tumors. (A)** Left panel shows the treatment scheme used for the TC1/Luc head and neck  
4 model, with irradiation at 8 Gy at day 7 and two weekly injection of MT1. Right panel presents  
5 the Kaplan-Meier survival curves of the different treatment groups. **(B)** *In vivo* bioluminescent  
6 imaging was performed to follow tumor growth, and quantification of the bioluminescent  
7 signal from individual mice was performed at different time points post treatment (For A and  
8 B: n = 17-33 mice/group from 4 independent experiments). **(C)** Left panel presents the  
9 treatment scheme used for the SCC VII head and neck mouse model, with irradiation at 12 Gy  
10 at day 9 and two weekly injection of MT1. Right panel shows the Kaplan-Meier survival curves  
11 (n= 10-12 mice/group from 3 independent experiments). **(D)** Left panel shows the treatment  
12 scheme used for the LL2/Luc lung orthotopic mouse model and includes the irradiation at 12  
13 Gy at day 5 and two weekly injection of MT1. Right panel presents the Kaplan-Meier survival  
14 curves (n= 4-15 mice/group from 2 independent experiments). For all panels: \*: p<0.05; \*\*:  
15 p<0.01; \*\*\*: p<0.001; \*\*\*\*: p<0.0001 (A; C-D, log-rank test,).

16 **Figure 2: TGF $\beta$ R2 inhibition by MT1 fosters an antitumor immune environment in irradiated**  
17 **tumors.** Mice bearing TC1/Luc tumors were treated as in Fig. 1A, and tumor specimens were  
18 collected 6 days post RT to perform cytofluorimetry analyses. **(A)** Histograms showing the  
19 number of cells/mg in the tumor for conventional CD4<sup>+</sup> T cells (Tconv), regulatory T cells  
20 (Tregs), natural killer cells (NK) and CD8<sup>+</sup> T cells. **(B)** Percent of CD8<sup>+</sup> T cells expressing IFN $\gamma$  in  
21 the different groups (for C and D: n = 8-9 mice from 3 independent experiments, mean  $\pm$  SEM  
22 is reported). **(C)** Cytokine profiling of whole-tumor protein extracts performed 6 days after

1 radiotherapy. For all panels: \*:  $p < 0.05$ ; \*\*\*:  $p < 0.001$ ; \*\*\*\*:  $p < 0.0001$  (Kruskal-Wallis with  
2 Dunn's multiple comparison test).

3 **Figure 3: MT1 favors in-depth cytotoxic T-cell infiltration in irradiated tumors.** Mice bearing  
4 TC1/Luc tumors were treated as in Fig. 1A, and tumor specimens were collected 6 days post  
5 RT to perform histological analyses. (A) Histogram representing the percent of viable tumor  
6 for each group quantified by histological examination. (B) Representative images of CD8  
7 staining by immunohistochemistry on head and neck tumors. (C) Quantification of CD8 T cell  
8 density per  $\text{mm}^2$ . (D-E) Semiquantitative scoring of the CD8 density at the tumor periphery (D)  
9 and at the tumor core (E). (F) Scans of tumor sections were segmented in 0.1 mm concentric  
10 layers, as shown in the representative image (left panel). Quantification of CD8 T cell density  
11 was performed in each layer, and cumulative densities starting from the tumor periphery (p)  
12 to the tumor core (c) for each group are reported in the middle panel. The right panel shows  
13 the ratio of CD8 in each group relative to the IgG group. For all panels,  $n = 8-9$  mice from 2  
14 independent experiments, \*:  $p < 0.05$ ; \*\*:  $p < 0.01$ ; \*\*\*:  $p < 0.001$ ; \*\*\*\*:  $p < 0.0001$  (one-way  
15 ANOVA with Tukey's multiple comparison test).

16 **Figure 4: MT1 and RT combination relies on CD8<sup>+</sup> T cells, and induces long-term antitumor**  
17 **memory.** (A) Quantification of the bioluminescent signal from individual TC1/luc tumors was  
18 performed at different time points post treatment in the different groups treated with or  
19 without anti-CD8 antibody (aCD8). (B) Kaplan-Meier mouse survival curves (For A-B,  $n = 11-12$   
20 mice/group from 2 independent experiments). (C) Left panel shows images of the  
21 bioluminescent signal 10 days after TC1/Luc injection in 10 mice previously treated with RT  
22 and MT1 that underwent complete TC1/Luc tumor clearance and that were still tumor free 60  
23 days after tumor grafting (Rechallenged), and in 5 treatment-naïve mice (Untreated). Right

1 panel present the summary table of mice that developed or not tumors. For all panels: \*:  
2  $p < 0.05$ ; \*\*:  $p < 0.01$ ; \*\*\*:  $p < 0.001$  (log-rank test).

3 **Figure 5: TGF $\beta$ R2 inhibition triggers the production of IFN $\beta$  by macrophages following**  
4 **irradiation. (A)** Histograms representing the number of TAMs and Ly6C<sup>high</sup> monocytes/mg of  
5 TC1/Luc tumor. **(B)** Mean fluorescence intensity (MFI) of TAMs and Ly6C<sup>high</sup> monocytes  
6 expressing PD-L1 in the different indicated groups (for A and B: n = 8-9 mice from 3  
7 independent experiments, mean  $\pm$  SEM is reported). **(C)** Histogram representing the  
8 production of IFN $\beta$  by irradiated RAW264.7 cells determined by ELISA after treatment with  
9 different doses of TGF $\beta$ . **(D)** Production of IFN $\beta$  by RAW264.7 cells with or without irradiation  
10 and treated or not with 0.5 ng/ml TGF $\beta$  and/or MT1 (for C and D, data from 2 independent  
11 experiments performed in duplicate, mean  $\pm$  SEM is reported). **(E)** Quantification of IFN $\beta$   
12 production by BMDMs differentiated with M-CSF for 5 days and then irradiated or not and  
13 treated with 0.5 ng/ml TGF $\beta$  and/or MT1 (n=8-11 from 3 independent experiments). **(F)** Mice  
14 bearing TC1/Luc tumors were irradiated and treated with or without MT1 before euthanasia  
15 and tumor macrophages sorting (left panel). The right panel represents the quantification of  
16 IFN $\beta$  RNA in the extracted macrophages analyzed by qPCR. For all panels: \*:  $p < 0.05$ ; \*\*:  
17  $p < 0.01$ ; \*\*\*\*:  $p < 0.0001$  (A,B Kruskal-Wallis with Dunn's multiple comparison test; C,D, E one-  
18 way ANOVA with Šidák's multiple comparison test, F Welch's t test).

19 **Figure 6: The type I interferon pathway mediates the immune-stimulating antitumor effects**  
20 **of TGF $\beta$ R2 inhibition. (A)** Kaplan-Meier mouse survival curves of the different TC1/Luc groups  
21 treated with anti-type I IFN receptor subunit 1 antibody (IFNAR) or isotype control (IgG, n = 6-  
22 12 mice from 2 independent experiments). **(B)** Histogram representing the percent of viable  
23 tumor for each group. **(C)** Representative images of CD8 staining by immunohistochemistry on head

1 and neck tumors for the RT+IgG (left), RT+MT1 (middle) and RT+IFNAR (right) groups. **(D)**  
2 Quantification of total CD8<sup>+</sup> T cell density per mm<sup>2</sup> in head and neck tumors. **(E-F)**.  
3 Semiquantitative scoring of the CD8 density at the tumor periphery (E) and at the tumor core  
4 **(F)** (For B, D-F, n=7-9 from 2 independent experiments). **(G)** Tumor signals were quantified by  
5 bioluminescence *in vivo* imaging 7 days post radiotherapy for the different groups of irradiated  
6 mice that received intratumor clodronate liposomes (Clodro) or the control PBS liposomes  
7 (Lipo CTRL) and/or MT1. **(H)** Kaplan-Meier survival curves of the different groups of irradiated  
8 mice that received intratumor clodronate liposomes or the liposome controls and/or MT1 (For  
9 G-H, n=8-9 mice from 2 independent experiments). For all panels: \*: p<0.05; \*\*: p<0.01; \*\*\*:  
10 p<0.001; \*\*\*\*: p<0.0001 (A,H log-rank test, B and D-G one-way ANOVA with Tukey's multiple  
11 comparison test).

## 12 REFERENCES

- 13 1. Wennerberg E, Vanpouille-Box C, Bornstein S, Yamazaki T, Demaria S, Galluzzi L. Immune  
14 recognition of irradiated cancer cells. *Immunol Rev.* 2017;280:220–30.
- 15 2. Deng L, Liang H, Xu M, Yang X, Burnette B, Arina A, et al. STING-dependent Cytosolic DNA  
16 Sensing Promotes Radiation-induced Type I interferon-dependent Antitumor Immunity in  
17 Immunogenic Tumors. *Immunity.* 2014;41:843–52.
- 18 3. Kalbasi A, Komar C, Tooker GM, Liu M, Lee JW, Gladney WL, et al. Tumor-Derived CCL2  
19 Mediates Resistance to Radiotherapy in Pancreatic Ductal Adenocarcinoma. *Clin Cancer Res.*  
20 2017;23:137–48.
- 21 4. Mondini M, Loyher P-L, Hamon P, Gerbé de Thoré M, Laviron M, Berthelot K, et al. CCR2-  
22 Dependent Recruitment of Tregs and Monocytes Following Radiotherapy Is Associated with  
23 TNF $\alpha$ -Mediated Resistance. *Cancer Immunol Res.* 2019;7:376–87.
- 24 5. Larson C, Oronsky B, Carter CA, Oronsky A, Knox SJ, Sher D, et al. TGF-beta: a master immune  
25 regulator. *Expert Opin Ther Targets.* 2020;24:427–38.
- 26 6. Dahmani A, Delisle J-S. TGF- $\beta$  in T Cell Biology: Implications for Cancer Immunotherapy.  
27 *Cancers (Basel).* 2018;10.
- 28 7. Mariathasan S, Turley SJ, Nickles D, Castiglioni A, Yuen K, Wang Y, et al. TGF $\beta$  attenuates  
29 tumour response to PD-L1 blockade by contributing to exclusion of T cells. *Nature.*  
30 2018;554:544–8.

- 1 8. Tauriello DVF, Palomo-Ponce S, Stork D, Berenguer-Llargo A, Badia-Ramentol J, Iglesias M,  
2 et al. TGF $\beta$  drives immune evasion in genetically reconstituted colon cancer metastasis.  
3 Nature. 2018;554:538–43.
- 4 9. Gunderson AJ, Yamazaki T, McCarty K, Fox N, Phillips M, Alice A, et al. TGF $\beta$  suppresses CD8+  
5 T cell expression of CXCR3 and tumor trafficking. Nat Commun. 2020;11:1749.
- 6 10. Miyazono K, Hellman U, Wernstedt C, Heldin CH. Latent high molecular weight complex of  
7 transforming growth factor beta 1. Purification from human platelets and structural  
8 characterization. J Biol Chem. 1988;263:6407–15.
- 9 11. Barcellos-Hoff MH, Dix TA. Redox-mediated activation of latent transforming growth  
10 factor-beta 1. Mol Endocrinol. 1996;10:1077–83.
- 11 12. Vanpouille-Box C, Diamond JM, Pilonis KA, Zavadil J, Babb JS, Formenti SC, et al. TGF $\beta$  Is a  
12 Master Regulator of Radiation Therapy-Induced Antitumor Immunity. Cancer Res.  
13 2015;75:2232–42.
- 14 13. Chen W, Ten Dijke P. Immunoregulation by members of the TGF $\beta$  superfamily. Nat Rev  
15 Immunol. 2016;16:723–40.
- 16 14. Batlle E, Massagué J. Transforming Growth Factor- $\beta$  Signaling in Immunity and Cancer.  
17 Immunity. 2019;50:924–40.
- 18 15. Zhong Z, Carroll KD, Policarpio D, Osborn C, Gregory M, Bassi R, et al. Anti-transforming  
19 growth factor beta receptor II antibody has therapeutic efficacy against primary tumor growth  
20 and metastasis through multieffects on cancer, stroma, and immune cells. Clin Cancer Res.  
21 2010;16:1191–205.
- 22 16. Ostapoff KT, Cenik BK, Wang M, Ye R, Xu X, Nugent D, et al. Neutralizing murine TGF $\beta$ R2  
23 promotes a differentiated tumor cell phenotype and inhibits pancreatic cancer metastasis.  
24 Cancer Res. 2014;74:4996–5007.
- 25 17. Tolcher AW, Berlin JD, Cosaert J, Kauh J, Chan E, Piha-Paul SA, et al. A Phase 1 Study of  
26 Anti-TGF $\beta$  Receptor Type-II Monoclonal Antibody LY3022859 in Patients with Advanced Solid  
27 Tumors. Cancer Chemother Pharmacol. 2017;79:673–80.
- 28 18. Farah M, Nelson KC, Tetzlaff MT, Nagarajan P, Torres-Cabala CA, Prieto VG, et al. Lichen  
29 planus related to transforming growth factor beta inhibitor in a patient with metastatic  
30 chondrosarcoma: a case report. J Cutan Pathol. 2020;47:490–3.
- 31 19. Lin KY, Guarnieri FG, Staveley-O’Carroll KF, Levitsky HI, August JT, Pardoll DM, et al.  
32 Treatment of established tumors with a novel vaccine that enhances major histocompatibility  
33 class II presentation of tumor antigen. Cancer Res. 1996;56:21–6.
- 34 20. Mondini M, Nizard M, Tran T, Mauge L, Loi M, Clémenson C, et al. Synergy of Radiotherapy  
35 and a Cancer Vaccine for the Treatment of HPV-Associated Head and Neck Cancer. Mol Cancer  
36 Ther. 2015;14:1336–45.

- 1 21. Tran Chau V, Liu W, Gerbé de Thoré M, Meziani L, Mondini M, O'Connor MJ, et al.  
2 Differential therapeutic effects of PARP and ATR inhibition combined with radiotherapy in the  
3 treatment of subcutaneous versus orthotopic lung tumour models. *Br J Cancer*.  
4 2020;123:762–71.
- 5 22. Meng Y, Beckett MA, Liang H, Mauceri HJ, Rooijen N van, Cohen KS, et al. Blockade of  
6 Tumor Necrosis Factor  $\alpha$  Signaling in Tumor-Associated Macrophages as a Radiosensitizing  
7 Strategy. *Cancer Res. American Association for Cancer Research*; 2010;70:1534–43.
- 8 23. Hellmann MD, Chaft JE, William WN, Rusch V, Pisters KMW, Kalhor N, et al. Pathological  
9 response after neoadjuvant chemotherapy in resectable non-small-cell lung cancers: proposal  
10 for the use of major pathological response as a surrogate endpoint. *Lancet Oncol*.  
11 2014;15:e42-50.
- 12 24. Meziani L, Gerbé de Thoré M, Hamon P, Bockel S, Louzada RA, Clemenson C, et al. Dual  
13 oxidase 1 limits the IFN $\gamma$ -associated antitumor effect of macrophages. *J Immunother Cancer*.  
14 2020;8:e000622.
- 15 25. Van Overmeire E, Stijlemans B, Heymann F, Keirsse J, Morias Y, Elkrim Y, et al. M-CSF and  
16 GM-CSF Receptor Signaling Differentially Regulate Monocyte Maturation and Macrophage  
17 Polarization in the Tumor Microenvironment. *Cancer Res*. 2016;76:35–42.
- 18 26. Ribbat-Idel J, Perner S, Kuppler P, Klapper L, Krupar R, Watermann C, et al. Immunologic  
19 “Cold” Squamous Cell Carcinomas of the Head and Neck Are Associated With an Unfavorable  
20 Prognosis. *Front Med (Lausanne)*. 2021;8:622330.
- 21 27. Formenti SC, Demaria S. Combining radiotherapy and cancer immunotherapy: a paradigm  
22 shift. *J Natl Cancer Inst*. 2013;105:256–65.
- 23 28. Chen J, Chen C, Zhan Y, Zhou L, Chen J, Cai Q, et al. Heterogeneity of IFN-Mediated  
24 Responses and Tumor Immunogenicity in Patients with Cervical Cancer Receiving Concurrent  
25 Chemoradiotherapy. *Clin Cancer Res*. 2021;
- 26 29. Mondini M, Deutsch E. (Chemo)Radiotherapy-Immunotherapy Combinations: Time to Get  
27 Tailored? *Clin Cancer Res*. 2021;
- 28 30. Rückert M, Flohr A-S, Hecht M, Gaipl US. Radiotherapy and the immune system: More than  
29 just immune suppression. *Stem Cells*. 2021;
- 30 31. Ochoa de Olza M, Navarro Rodrigo B, Zimmermann S, Coukos G. Turning up the heat on  
31 non-immunoreactive tumours: opportunities for clinical development. *Lancet Oncol*.  
32 2020;21:e419–30.
- 33 32. Farhood B, Khodamoradi E, Hoseini-Ghahfarokhi M, Motevaseli E, Mirtavoos-Mahyari H,  
34 Eleojo Musa A, et al. TGF- $\beta$  in radiotherapy: Mechanisms of tumor resistance and normal  
35 tissues injury. *Pharmacol Res*. 2020;155:104745.

- 1 33. Martin CJ, Datta A, Littlefield C, Kalra A, Chapron C, Wawersik S, et al. Selective inhibition  
2 of TGF $\beta$ 1 activation overcomes primary resistance to checkpoint blockade therapy by altering  
3 tumor immune landscape. *Sci Transl Med.* 2020;12.
- 4 34. Rodríguez-Ruiz ME, Rodríguez I, Mayorga L, Labiano T, Barbes B, Etxeberria I, et al. TGF $\beta$   
5 Blockade Enhances Radiotherapy Abscopal Efficacy Effects in Combination with Anti-PD1 and  
6 Anti-CD137 Immunostimulatory Monoclonal Antibodies. *Mol Cancer Ther.* American  
7 Association for Cancer Research; 2019;18:621–31.
- 8 35. Zhang M, Kleber S, Röhrich M, Timke C, Han N, Tuettenberg J, et al. Blockade of TGF- $\beta$   
9 signaling by the TGF $\beta$ R-I kinase inhibitor LY2109761 enhances radiation response and prolongs  
10 survival in glioblastoma. *Cancer Res.* 2011;71:7155–67.
- 11 36. Young KH, Newell P, Cottam B, Friedman D, Savage T, Baird JR, et al. TGF $\beta$  Inhibition Prior  
12 to Hypofractionated Radiation Enhances Efficacy in Preclinical Models. *Cancer Immunol Res.*  
13 American Association for Cancer Research; 2014;2:1011–22.
- 14 37. Vanpouille-Box C, Alard A, Aryankalayil MJ, Sarfraz Y, Diamond JM, Schneider RJ, et al. DNA  
15 exonuclease Trex1 regulates radiotherapy-induced tumour immunogenicity. *Nat Commun.*  
16 2017;8:15618.
- 17 38. Rückert M, Deloch L, Frey B, Schlücker E, Fietkau R, Gaipl US. Combinations of  
18 Radiotherapy with Vaccination and Immune Checkpoint Inhibition Differently Affect Primary  
19 and Abscopal Tumor Growth and the Tumor Microenvironment. *Cancers (Basel).* 2021;13:714.
- 20 39. Storzynsky Q, Hitt MM. The Impact of Radiation-Induced DNA Damage on cGAS-STING-  
21 Mediated Immune Responses to Cancer. *Int J Mol Sci.* 2020;21.
- 22 40. Härtlova A, Erttmann SF, Raffi FA, Schmalz AM, Resch U, Anugula S, et al. DNA damage  
23 primes the type I interferon system via the cytosolic DNA sensor STING to promote anti-  
24 microbial innate immunity. *Immunity.* 2015;42:332–43.
- 25 41. Guerin MV, Regnier F, Feuillet V, Vimeux L, Weiss JM, Bismuth G, et al. TGF $\beta$  blocks IFN $\alpha$ / $\beta$   
26 release and tumor rejection in spontaneous mammary tumors. *Nat Commun.* 2019;10:4131.
- 27 42. Zitvogel L, Galluzzi L, Kepp O, Smyth MJ, Kroemer G. Type I interferons in anticancer  
28 immunity. *Nat Rev Immunol.* 2015;15:405–14.
- 29 43. Fortis SP, Sofopoulos M, Sotiriadou NN, Haritos C, Vaxevanis CK, Anastasopoulou EA, et al.  
30 Differential intratumoral distributions of CD8 and CD163 immune cells as prognostic  
31 biomarkers in breast cancer. *J Immunother Cancer.* 2017;5:39.
- 32 44. König L, Mairinger FD, Hoffmann O, Bittner A-K, Schmid KW, Kimmig R, et al. Dissimilar  
33 patterns of tumor-infiltrating immune cells at the invasive tumor front and tumor center are  
34 associated with response to neoadjuvant chemotherapy in primary breast cancer. *BMC*  
35 *Cancer.* 2019;19:120.
- 36 45. Kather JN, Suarez-Carmona M, Charoentong P, Weis C-A, Hirsch D, Bankhead P, et al.  
37 Topography of cancer-associated immune cells in human solid tumors. *Elife.* 2018;7.

- 1 46. Peranzoni E, Lemoine J, Vimeux L, Feuillet V, Barrin S, Kantari-Mimoun C, et al.  
2 Macrophages impede CD8 T cells from reaching tumor cells and limit the efficacy of anti-PD-1  
3 treatment. *Proc Natl Acad Sci U S A*. 2018;115:E4041–50.
- 4 47. Castriconi R, Dondero A, Bellora F, Moretta L, Castellano A, Locatelli F, et al.  
5 Neuroblastoma-derived TGF- $\beta$ 1 modulates the chemokine receptor repertoire of human  
6 resting NK cells. *J Immunol*. 2013;190:5321–8.
- 7 48. Regis S, Dondero A, Caliendo F, Bottino C, Castriconi R. NK Cell Function Regulation by TGF-  
8  $\beta$ -Induced Epigenetic Mechanisms. *Front Immunol*. 2020;11:311.
- 9 49. Liu Y, Zhang P, Li J, Kulkarni AB, Perruche S, Chen W. A critical function for TGF-beta  
10 signaling in the development of natural CD4+CD25+Foxp3+ regulatory T cells. *Nat Immunol*.  
11 2008;9:632–40.
- 12 50. De Martino M, Daviaud C, Diamond JM, Kraynak J, Alard A, Formenti SC, et al. Activin A  
13 Promotes Regulatory T-cell-Mediated Immunosuppression in Irradiated Breast Cancer. *Cancer*  
14 *Immunol Res*. 2021;9:89–102.

15



**A**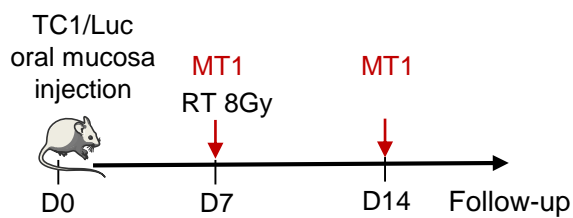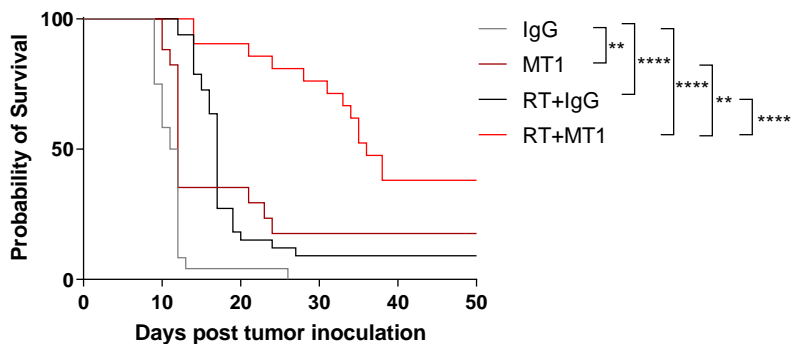**B**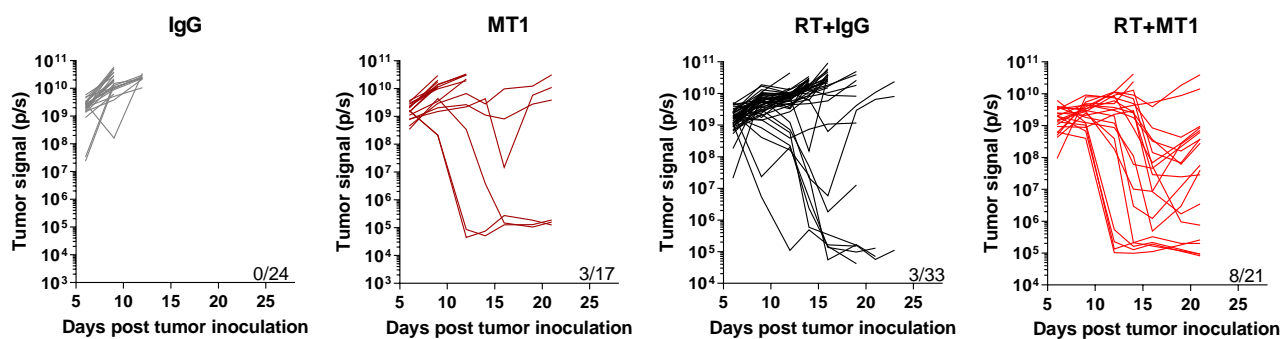**C**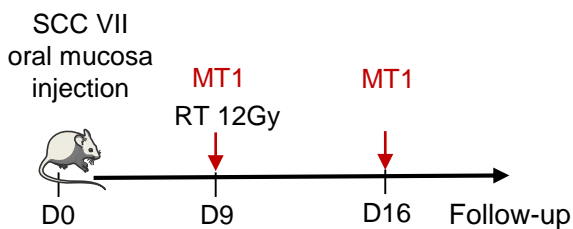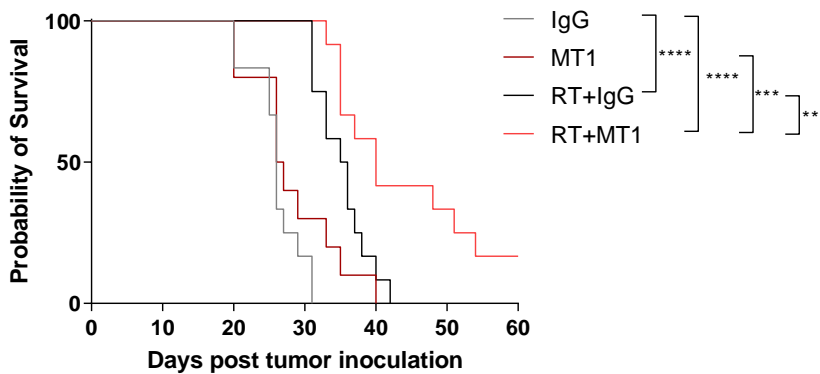**D**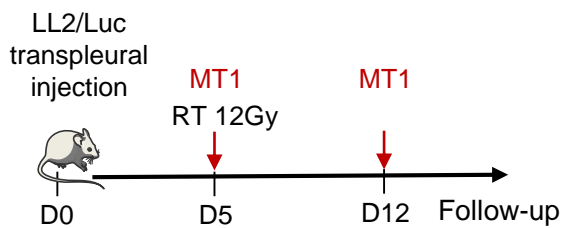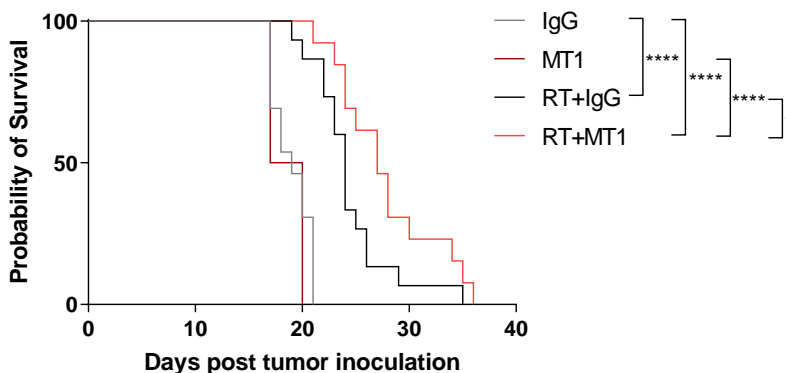

Figure 1

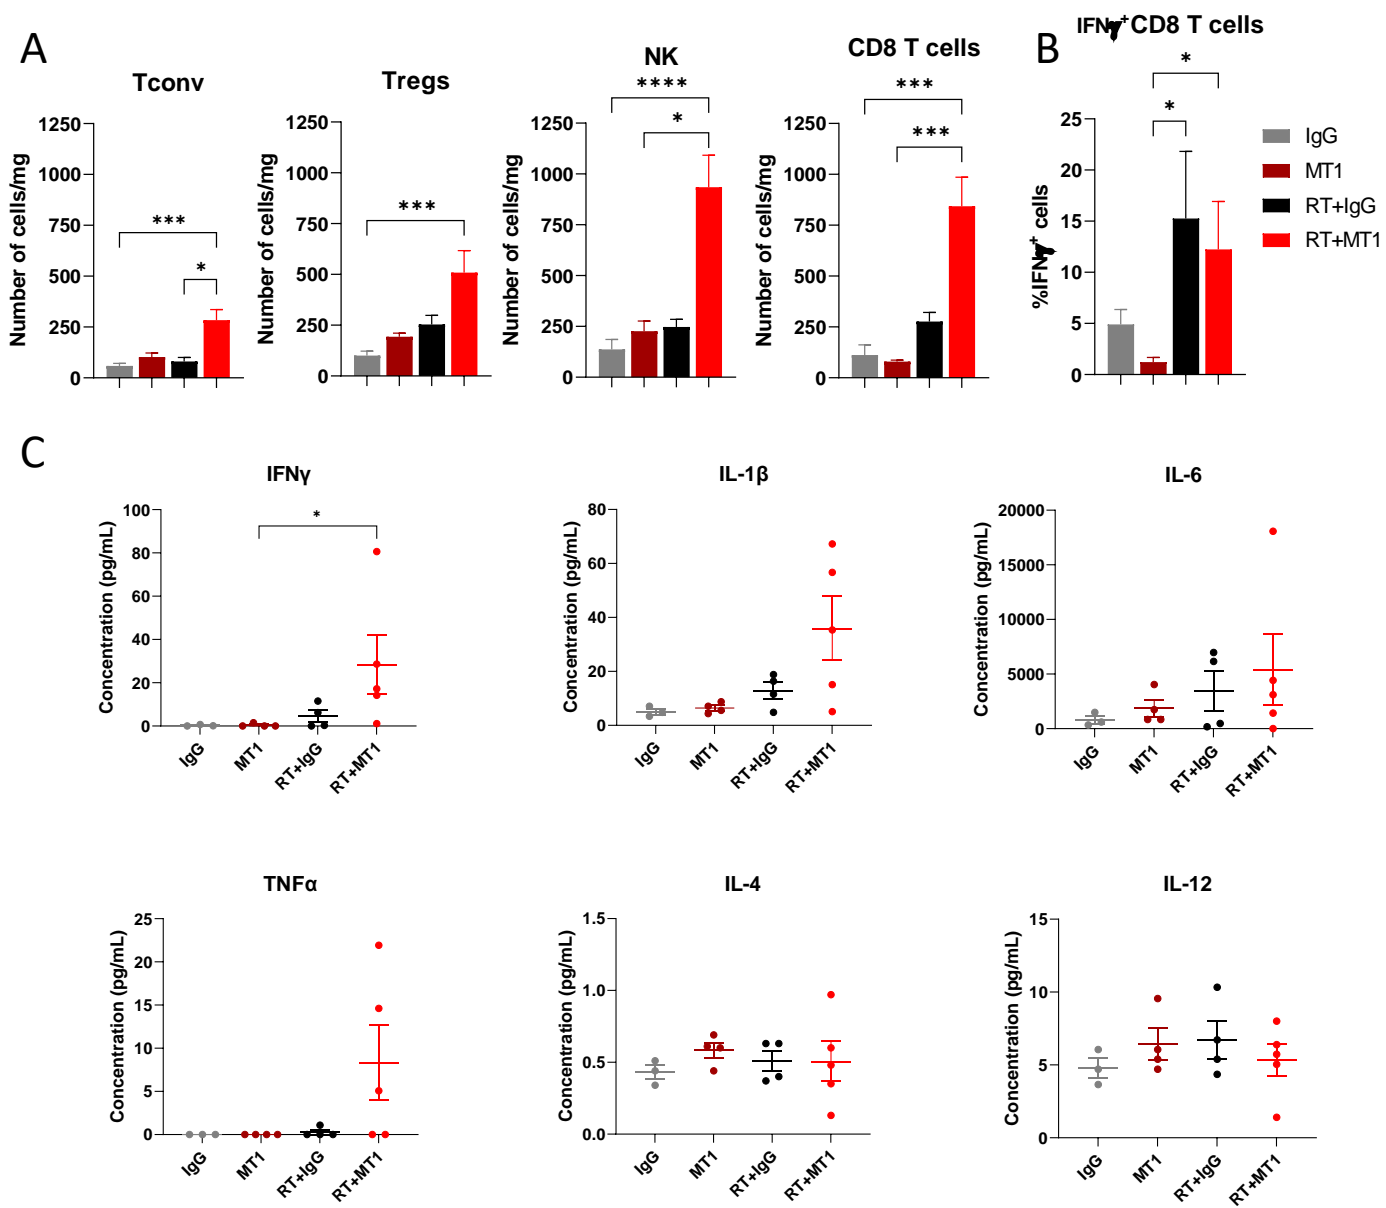

Figure 2

**A**

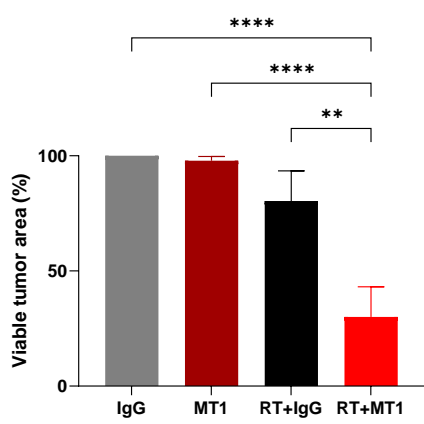

**B**

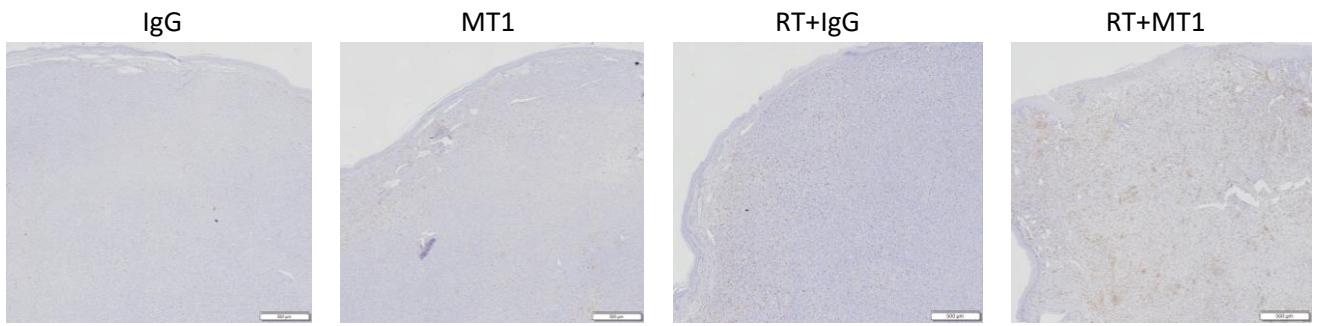

CD8 - Hematoxylin

**C**

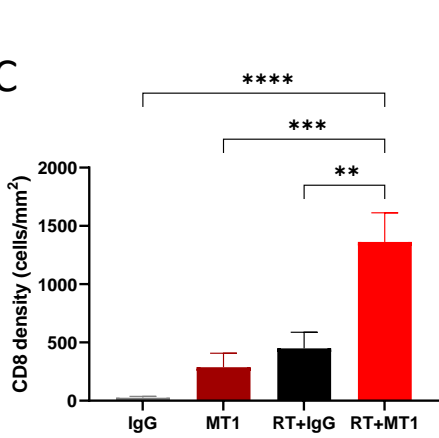

**D**

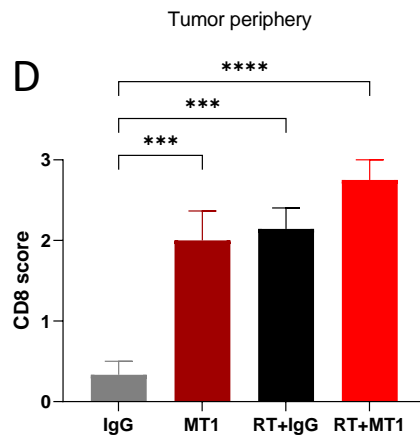

**E**

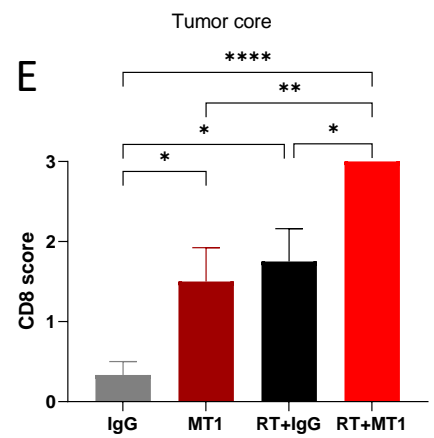

**F**

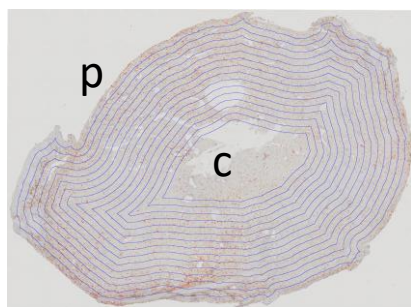

CD8 - Hematoxylin

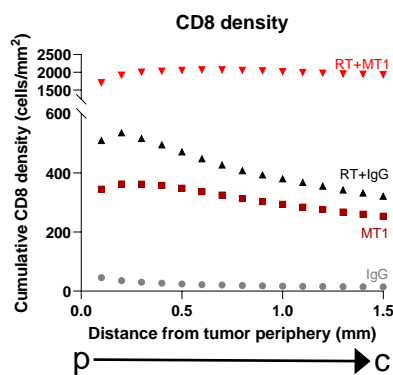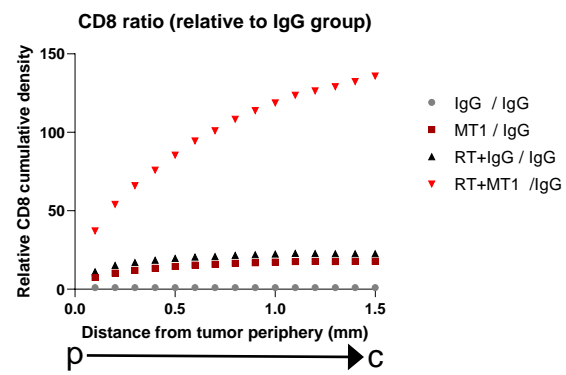

Figure 3

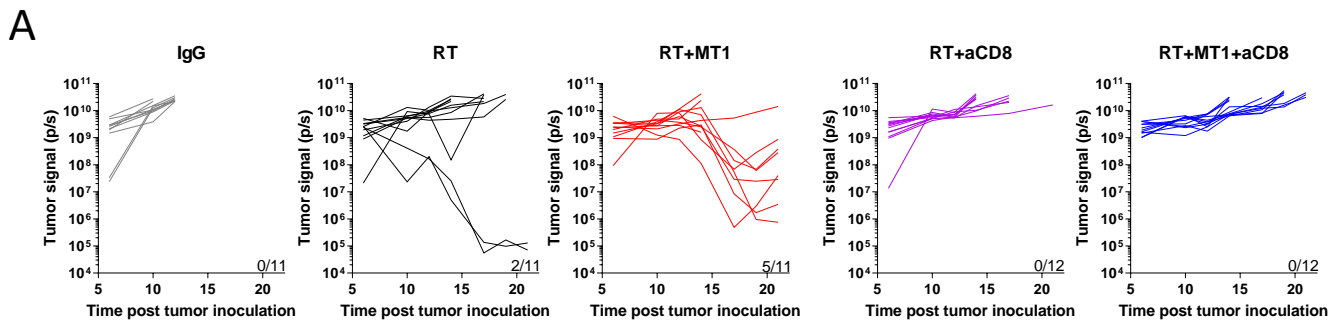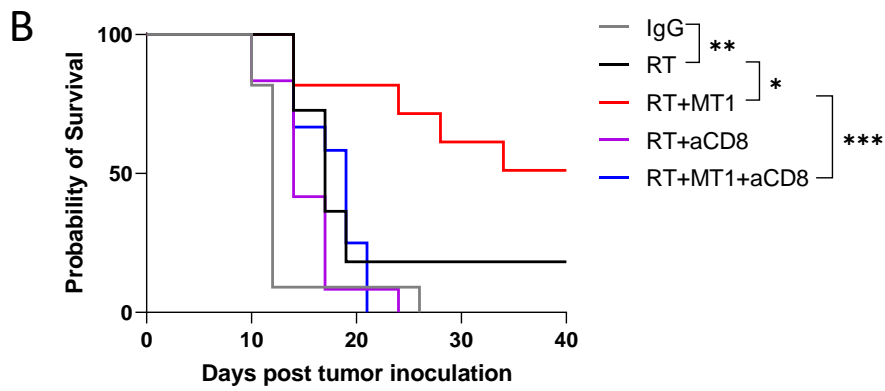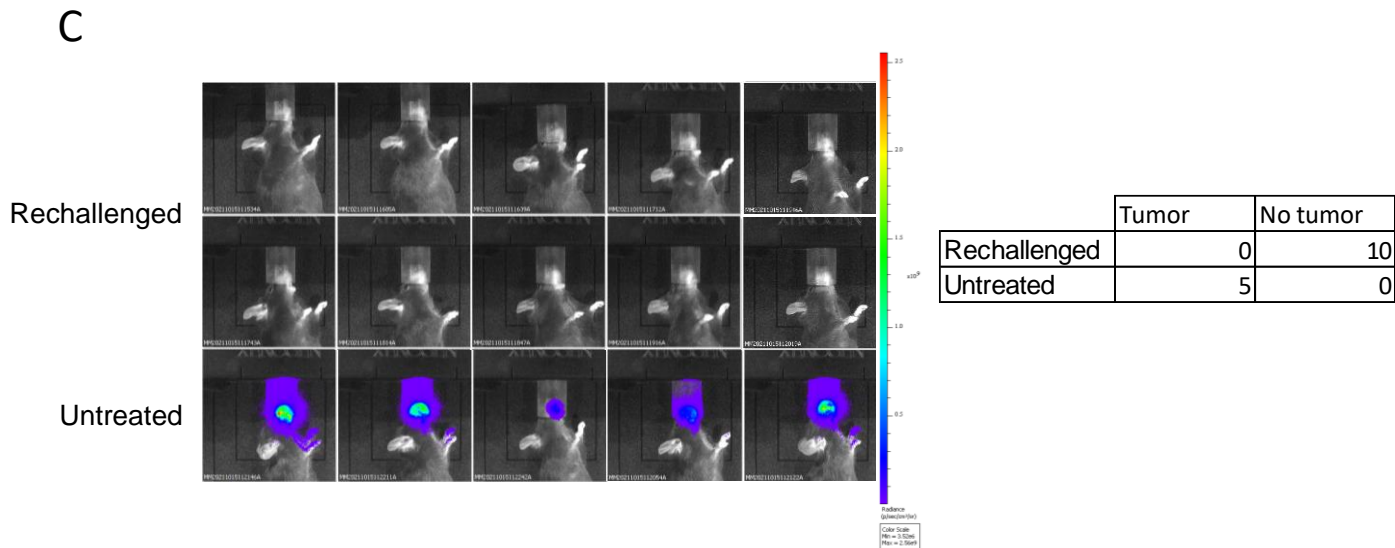

Figure 4

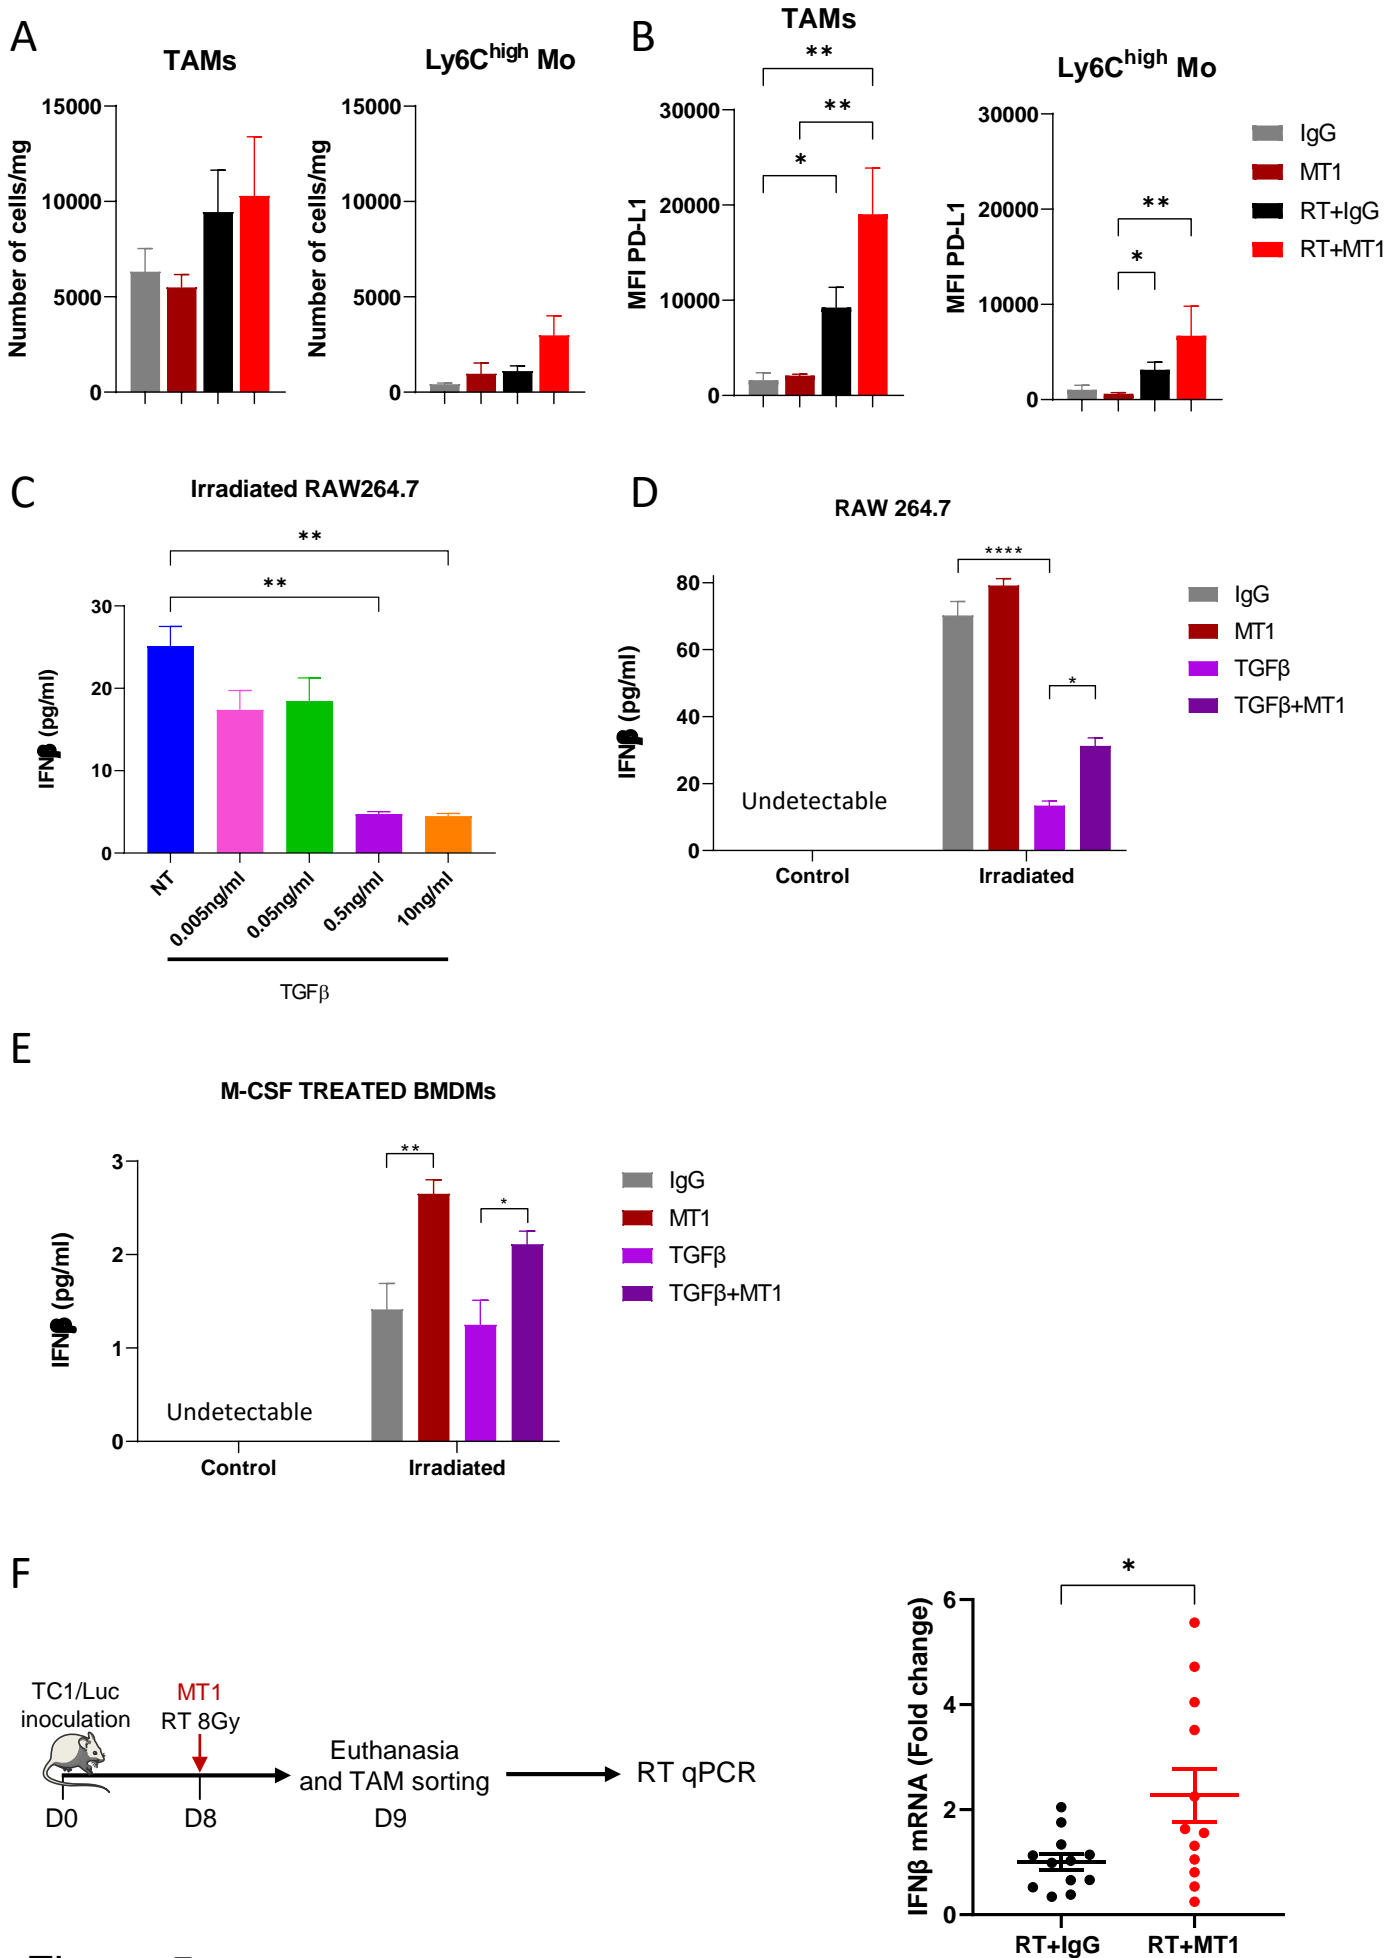

Figure 5

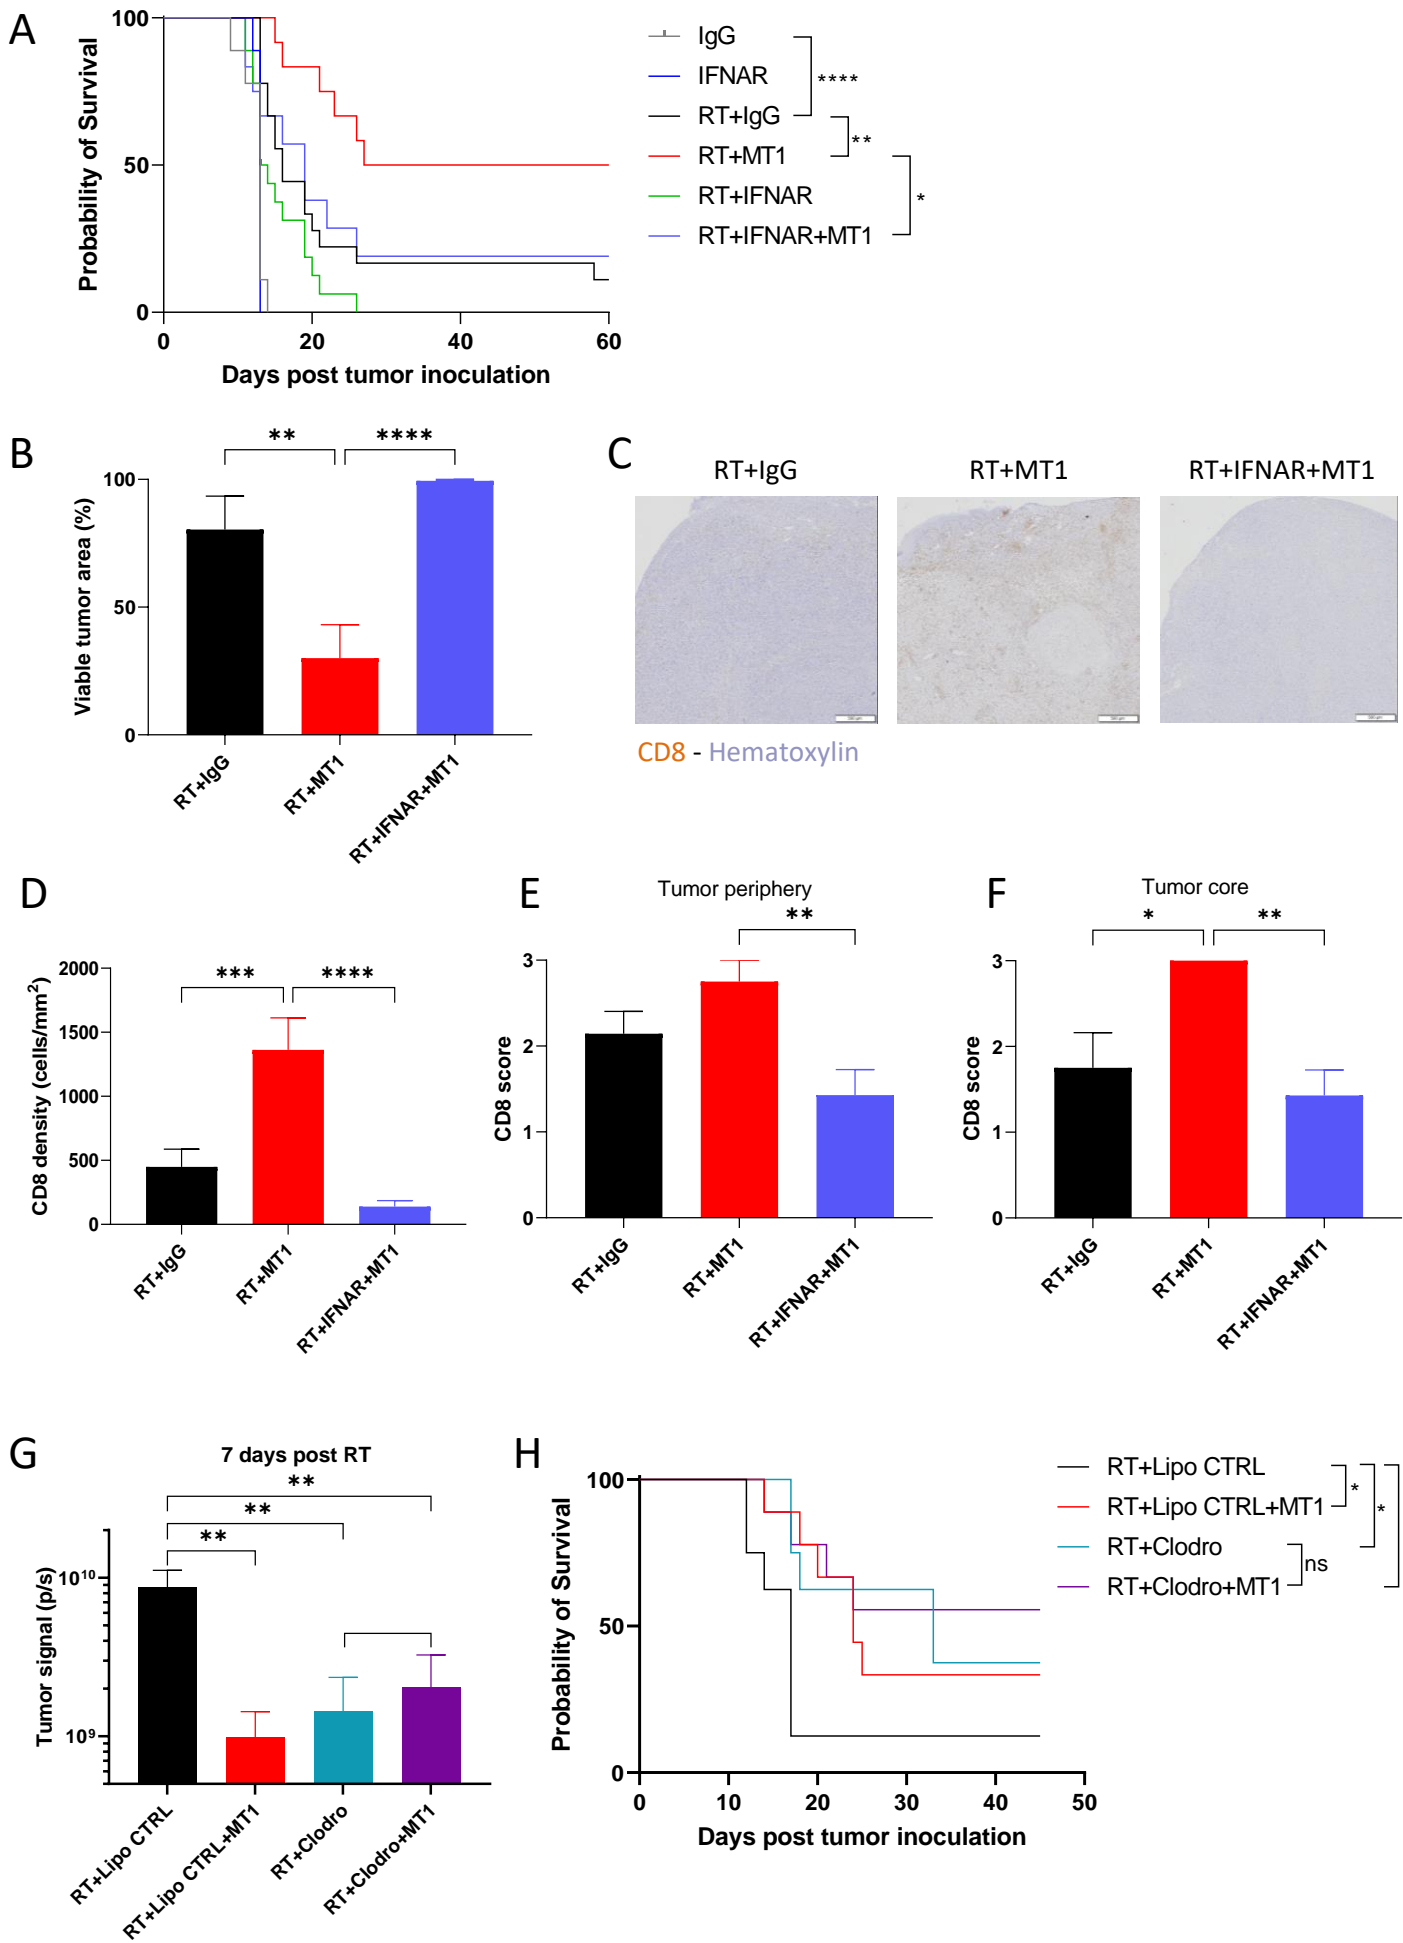

Figure 6
