# Supplementary material for: TGFβ receptor inhibition unleashes interferon-β production by tumor-associated macrophages and enhances radiotherapy efficacy
Source: bioRxiv or medRxiv preprint supplement (doi:10.1101/2022.01.17.476557), 2022-01-19
Supplement: Supplementary file [file media-1.pdf]

1 **Supplementary Figure 1: TGFβR1 inhibition improves radiotherapy efficacy against head and**  
2 **neck orthotopic tumors. (A)** Quantification of the bioluminescent signal from individual  
3 tumors was performed at different time points post treatment in mice treated with the  
4 TGFβR1 inhibitor LY3200882, RT or RT+ LY3200882 7 days after TC1/Luc inoculation (n = 12-  
5 19 mice/group from 2 independent experiments). **(B)** Kaplan-Meier survival curves. **(C)** Tumor  
6 signals were quantified by bioluminescence *in vivo* imaging 7 days post radiotherapy for each  
7 indicated group. For all panels: \*: p<0.05; \*\*\*: p<0.001; \*\*\*\*: p<0.0001; ns: non-significant (**B**  
8 log-rank test, **C** one-way ANOVA with Tukey's multiple comparison test).

9 **Supplementary Figure 2: Combination of RT and MT1 modulates tumor vascularization and**  
10 **hypoxia. (A)** Histogram representing the percent of TC1/Luc tumor vascularization,  
11 representing the % of the area covered by CD31-positive vessels by IHC for each group. **(B)**  
12 Representative images of the co-staining of CD8 (pink) and CD31 (red) by IHC on head and  
13 neck tumors. **(C)** Histogram shows the density of CAIX+ cells by IHC to quantify hypoxia in the  
14 tumors of the different groups. **(D)** Representative images of the CAIX staining. For A-B, D,  
15 n=8-9 mice from 2 independent experiments, \*\*: p<0.01; \*\*\*: p<0.001 (Kruskal-Wallis with  
16 Dunn's multiple comparison test).

17 **Supplementary Figure 3: Immunodeficient mice do not respond to the RT+MT1**  
18 **combination. (A)** Quantification of the bioluminescent signal from individual tumors was  
19 performed at different time points post treatment in immunodeficient nude mice. **(B)** Kaplan-  
20 Meier mouse survival curves. For all panels: n = 7-8 mice/group from one experiment, \*\*\*:  
21 p<0.001; \*\*\*\*: p<0.0001.

1 **Supplementary Figure 4: TGF $\beta$ R2 blockade induce IFN $\beta$  production by macrophages**  
2 **following radiotherapy in head and neck and lung tumor models. (A)** Mice were injected with  
3 SCC VII cells at a submucoal site in the inner lip to establish a head and neck model. They were  
4 then irradiated and treated with or without MT1 before sacrifice and tumor macrophages  
5 sorting (left panel). The right panel represents the quantification of IFN $\beta$  mRNA in the sorted  
6 tumor macrophages analyzed by qPCR. **(B)** Orthotopic lung tumor model was established by  
7 transpleural injection of LL2/Luc in the lung. Mice were then irradiated and treated or not with  
8 MT1 before sacrifice and macrophage sorting (left panel). The right panel shows the  
9 quantification of IFN $\beta$  mRNA in the sorted tumor macrophages analyzed by qPCR. For all  
10 panels: \*\*: p<0.01; (Welch's t test).

11 **Supplementary Figure 5: Anti-IFNAR administration impairs the RT and MT1 combination**  
12 **efficacy. (A)** Quantification of the bioluminescent signal from individual TC1/Luc tumors was  
13 performed at different time points post treatment in the different groups treated with anti-  
14 IFNAR (IFNAR) antibody or isotype control (IgG) (n = 6-12 mice from 2 independent  
15 experiments). **(B)** Quantification of the tumor vascularization (% of the area covered by CD31-  
16 positive vessels) by IHC for each group. **(C)** Histogram shows the density of CAIX positive cells  
17 by IHC to quantify hypoxia in the tumors of the different groups. **(D)** Kaplan-Meier survival  
18 curves of SCC VII head and neck model in the different groups (n=5-12 mice per groups from  
19 2 independent experiments). **(E)** Kaplan-Meier survival curves of LL2/Luc orthotopic lung  
20 tumor model in the different groups (n=4-6 mice per groups from 2 independent  
21 experiments). For all panels, \*: p<0.05; \*\*: p<0.01; \*\*\*: p<0.001; \*\*\*\*: p<0.0001 (C one-way  
22 ANOVA with Tukey's multiple comparison test, D-E log-rank test).

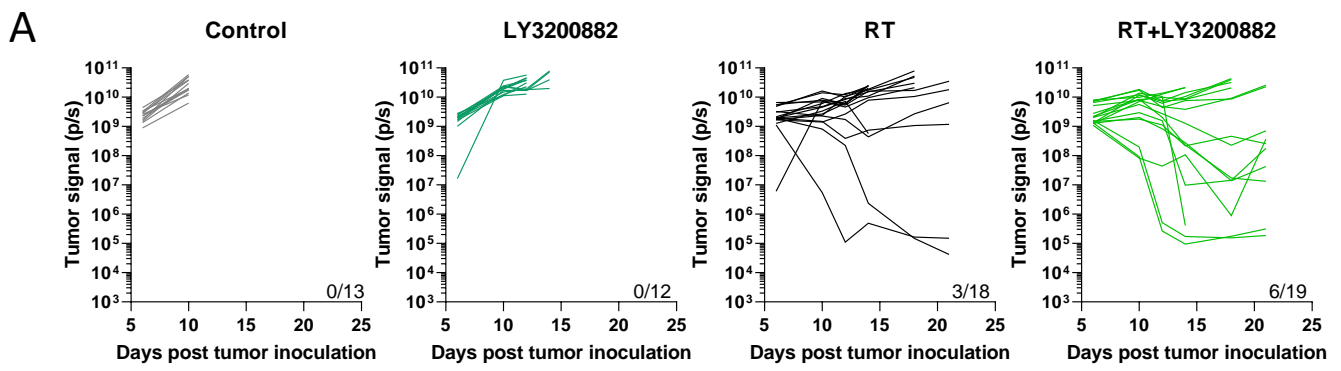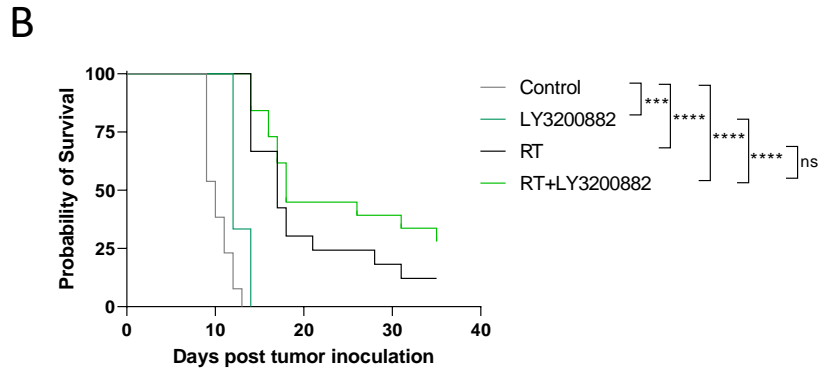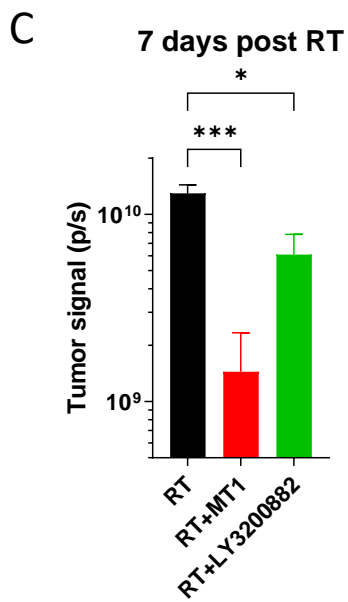

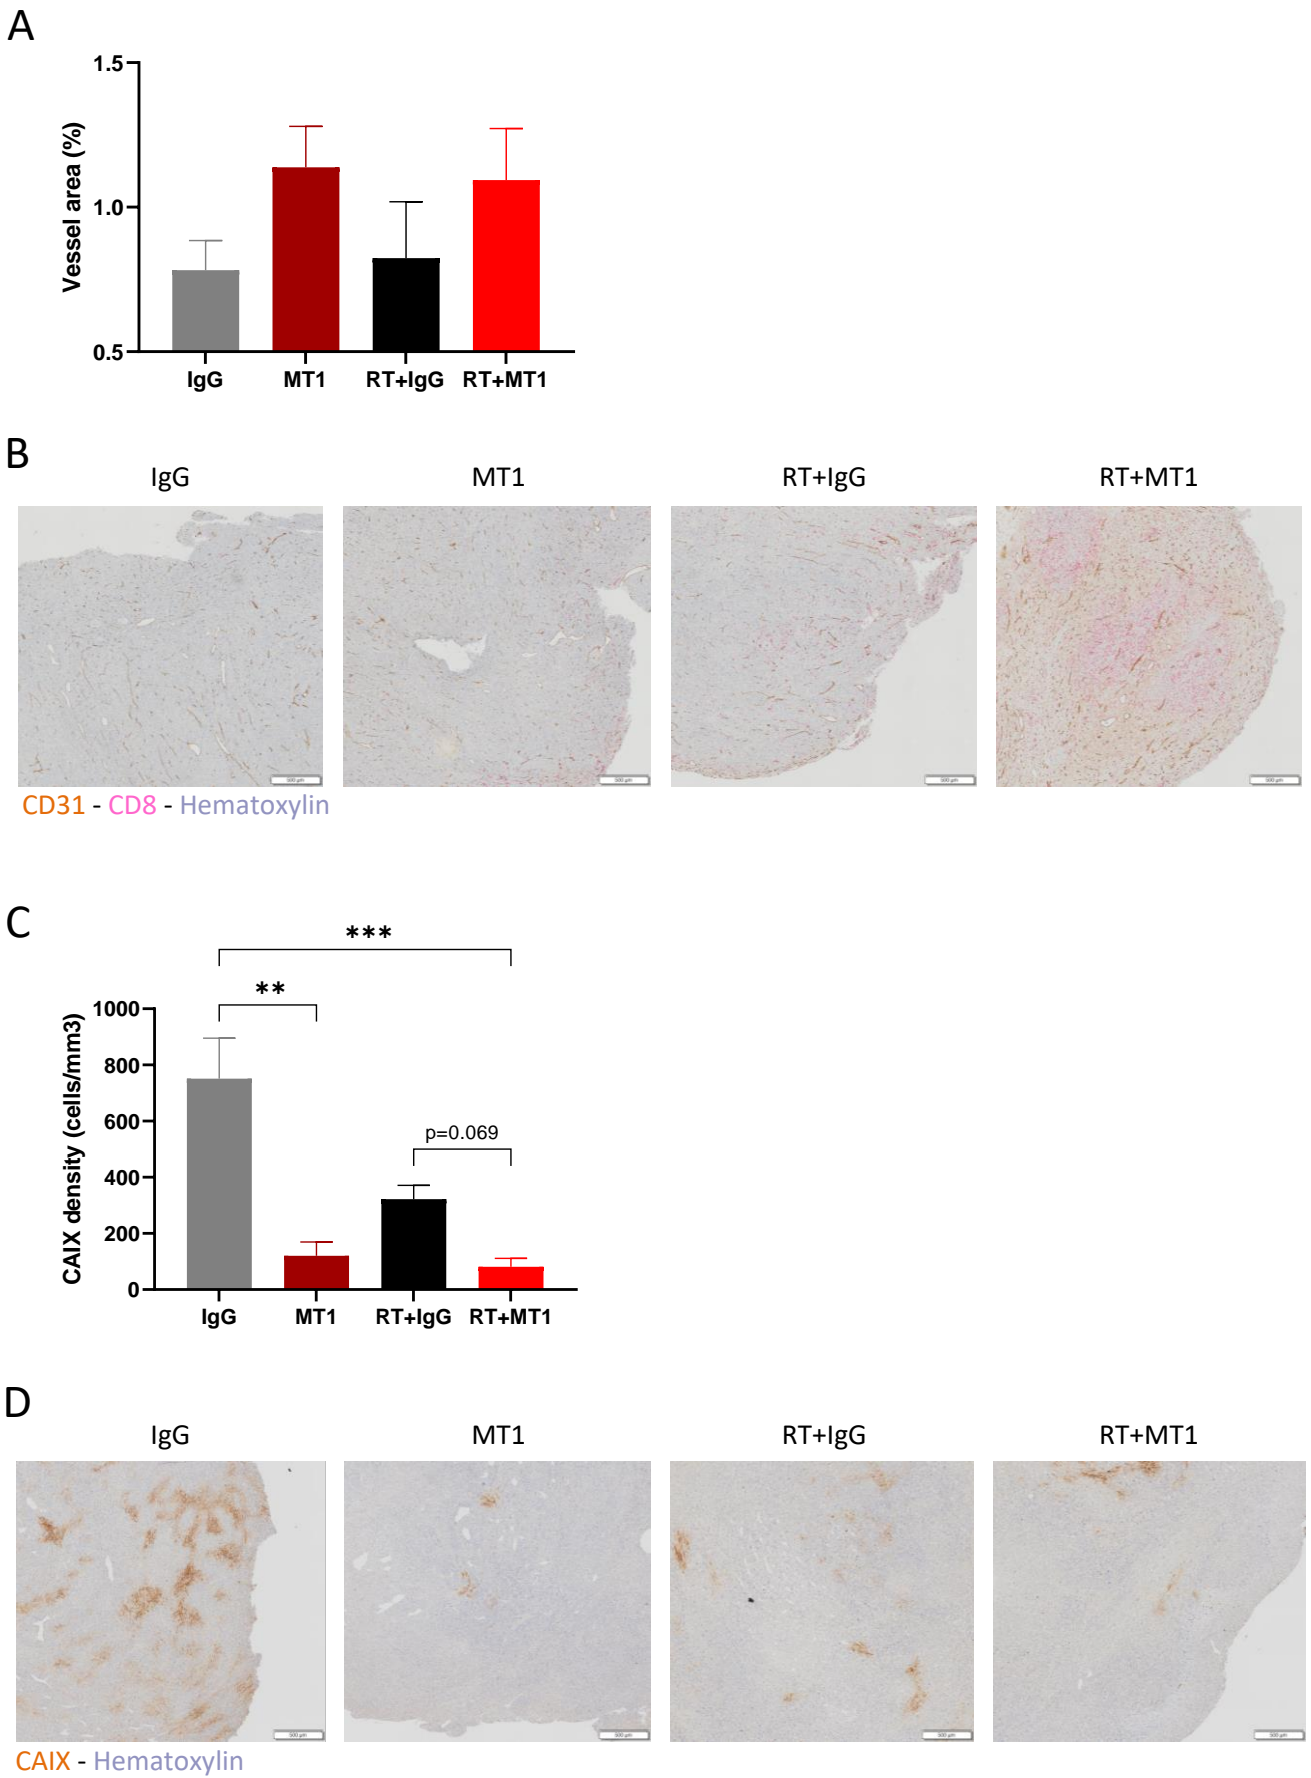

Supplementary Figure 2

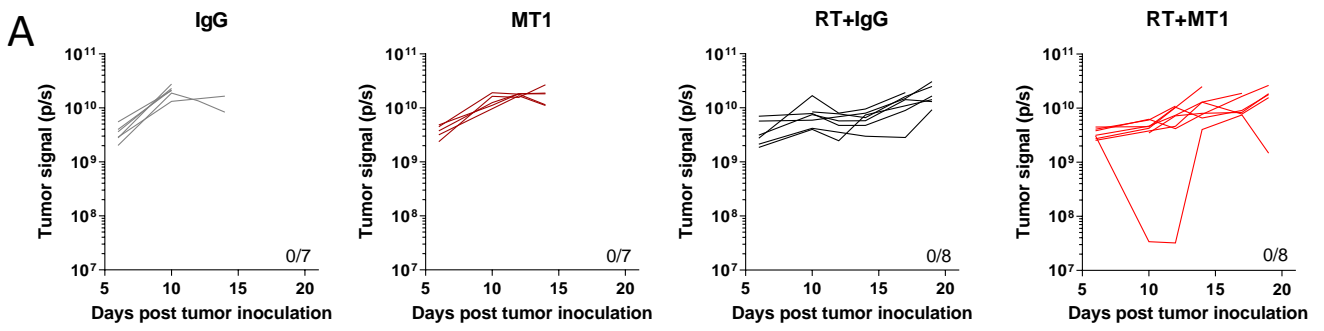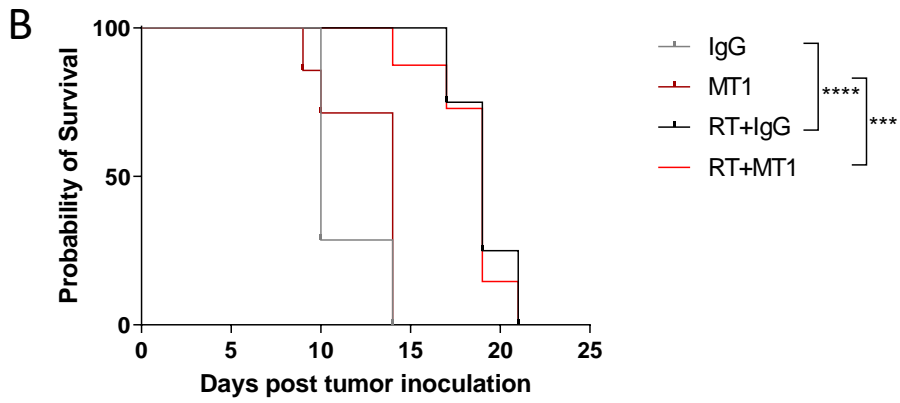

A

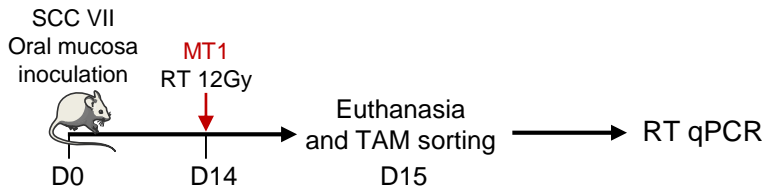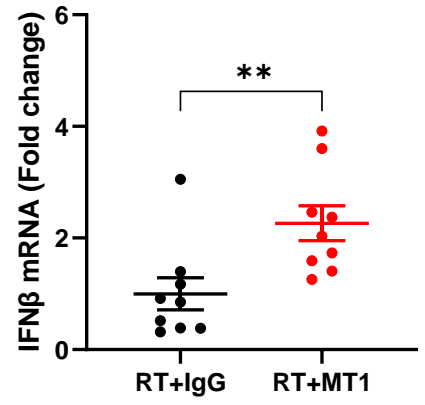

B

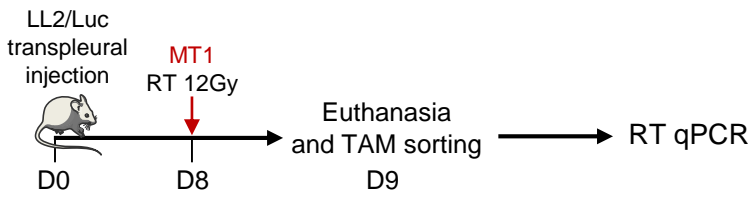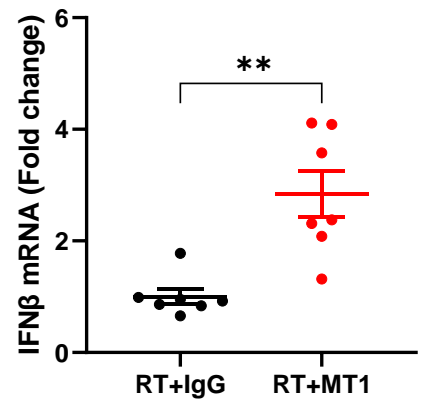

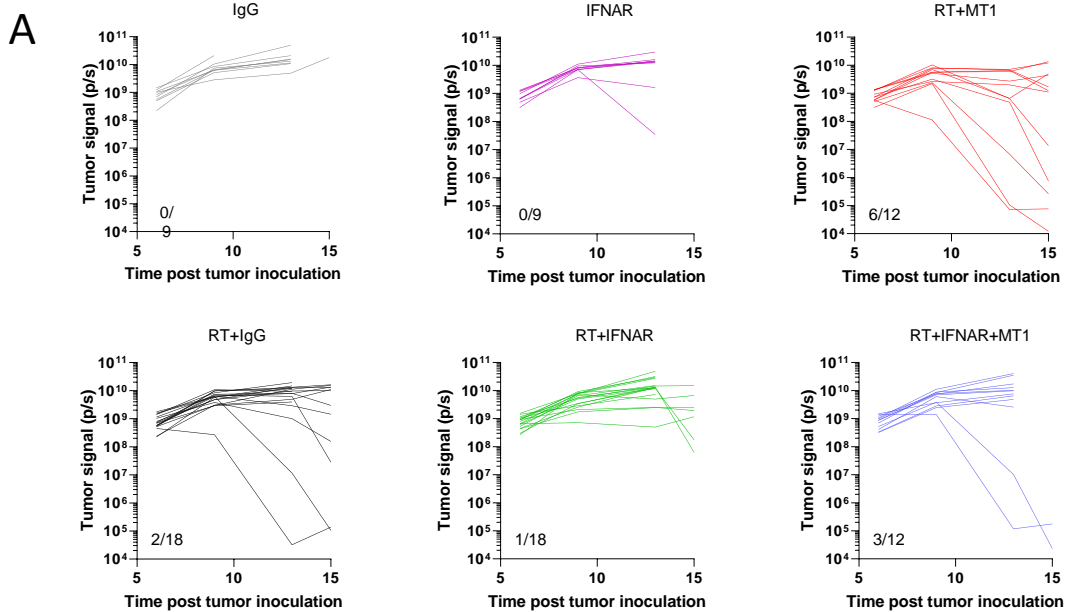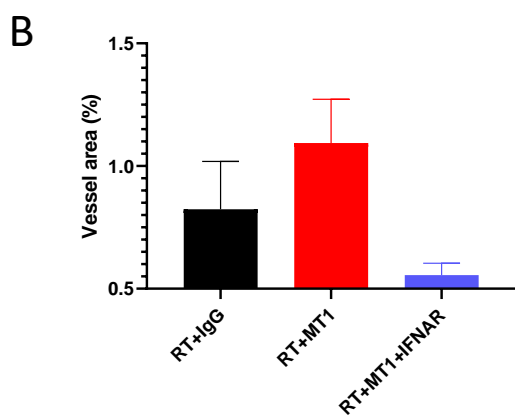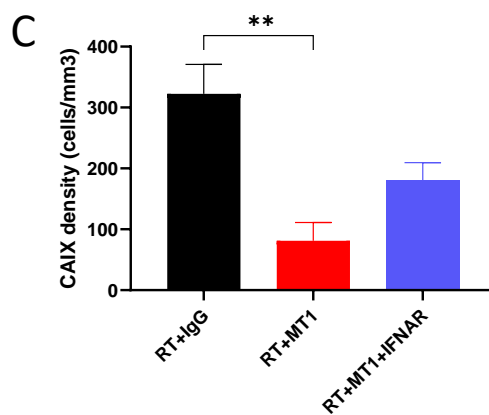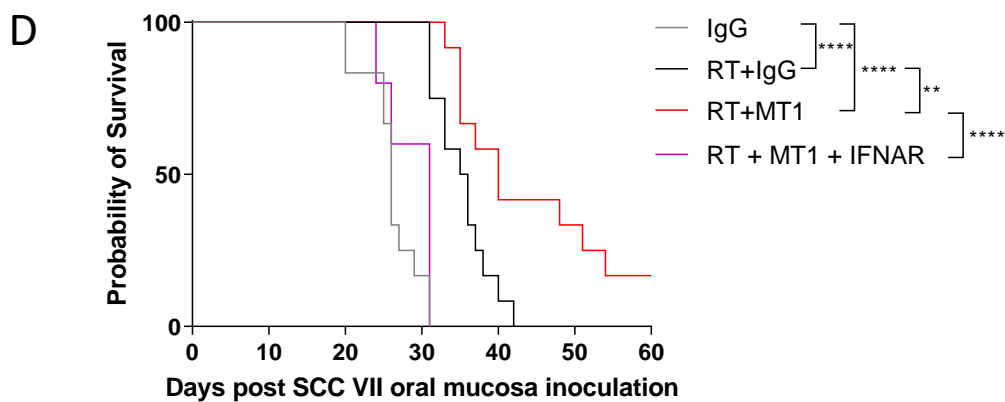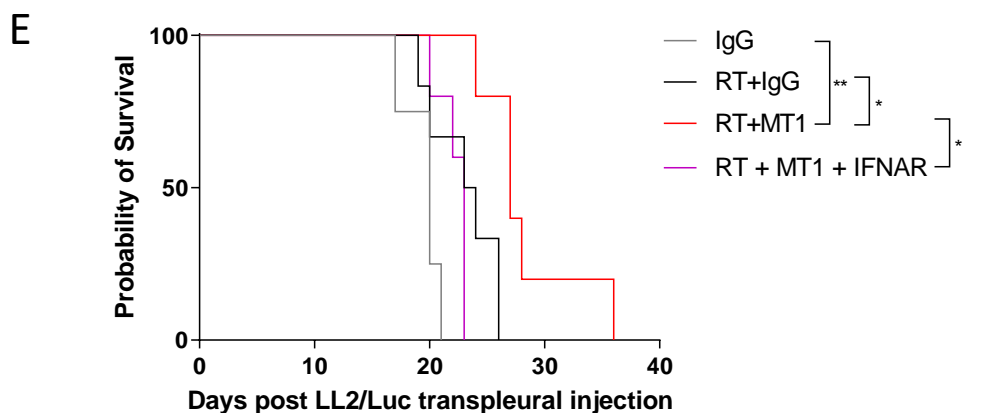

Supplementary Figure 5
